# Supplementary material for: A Phylogenomic Framework and Divergence History of Cephalochordata Amphioxus
Source: Front Physiol. 2018 Dec 18;9:1833. doi: 10.3389/fphys.2018.01833 (PMC6305399; doi:10.3389/fphys.2018.01833)
Supplement: TABLE S3 — Information of lineage-specific domains in Branchiostoma belcheri. [file Table_3.xlsx]

## Sheet: bbe.pfama
Table S3 Information of lineage-specific domains in Branchiostoma belcheri.
Pfam id	Pfam name	Pfam description	Align info(alu)
PF06356.6	DUF1064	Protein of unknown function (DUF1064)	133040F.t1:0.019,16.2;173090F.t1:0.22,12.8;
PF01374.13	Glyco_hydro_46	Glycosyl hydrolase family 46	006340R.t1:0.0084,17.0;038430F.t3:0.11,13.3;229010R.t2:0.13,13.0;038430F.t1:0.13,13.0;
PF11842.3	DUF3362	Domain of unknown function (DUF3362)	159510F.t1:0.16,13.1;
PF07516.8	SecA_SW	SecA Wing and Scaffold domain	028500F.t1:0.19,12.7;
PF01002.14	Flavi_NS2B	Flavivirus non-structural protein NS2B	032860F.t1:0.067,14.0;001470R.t1:0.22,12.4;165220R.t1:0.29,12.0;
PF07606.6	DUF1569	Protein of unknown function (DUF1569)	118090R.t1:0.33,12.1;
PF14790.1	THDPS_N	Tetrahydrodipicolinate N-succinyltransferase N-terminal	232820F.t1:0.34,11.8;
PF12438.3	DUF3679	Protein of unknown function (DUF3679)	073170R.t1:0.13,12.9;
PF07588.6	DUF1554	Protein of unknown function (DUF1554)	205360R.t3:0.0047,17.7;205360R.t2:0.0048,17.6;205360R.t4:0.0049,17.6;205360R.t1:0.005,17.6;
PF03090.12	Replicase	Replicase family	112940F.t1:0.24,12.5;
PF03866.8	HAP	Hydrophobic abundant protein (HAP)	163320F.t1:0.43,11.6;155920F.t4:0.64,11.1;
PF08259.6	Periviscerokin	Periviscerokinin family	122130R.t1:1,10.9;
PF01453.19	B_lectin	D-mannose binding lectin	079080R.t1:0.00048,21.2;253680F.t1:0.075,14.2;253670F.t1:0.41,11.8;
PF05273.8	Pox_RNA_Pol_22	Poxvirus RNA polymerase 22 kDa subunit	203910R.t1:0.0081,17.1;
PF05878.6	Phyto_Pns9_10	Phytoreovirus nonstructural protein Pns9/Pns10	104410F.t1:0.39,11.0;161630R.t1:6.4,7.0;161630R.t2:6.4,7.0;
PF09632.5	Rac1	Rac1-binding domain	286940R.t6:0.054,13.8;286940R.t3:0.058,13.7;286940R.t4:0.061,13.7;286940R.t1:0.28,11.5;286940R.t2:0.31,11.3;
PF05643.6	DUF799	Putative bacterial lipoprotein (DUF799)	215000F.t1:0.3,11.6;
PF14169.1	YdjO	Cold-inducible protein YdjO	012840R.t1:0.45,11.3;
PF03103.12	DUF243	Domain of unknown function (DUF243)	273870F.t3:1.6,10.2;273870F.t4:1.6,10.1;273870F.t2:1.6,10.1;
PF09619.5	YscW	Type III secretion system lipoprotein chaperone (YscW)	166940F.t1:0.33,11.9;
PF12314.3	IMCp	Inner membrane complex protein	134120R.t1:0.02,16.3;
PF15033.1	Kinocilin	Kinocilin protein	120060R.t1:0.16,12.8;201210R.t1:1,10.2;
PF05868.6	Rotavirus_VP7	Rotavirus major outer capsid protein VP7	040540F.t1:0.12,12.7;247810R.t1:0.24,11.8;
PF02341.10	RcbX	RbcX protein	155900F.t1:0.041,15.3;
PF10652.4	DUF2480	Protein of unknown function (DUF2480)	039280F.t1:0.25,12.2;
PF02876.12	Stap_Strp_tox_C	Staphylococcal/Streptococcal toxin, beta-grasp domain	069480F.t1:0.21,13.0;
PF07110.6	EthD	EthD domain	053260F.t1:0.16,14.2;
PF09041.5	Aurora-A_bind	Aurora-A binding	259870F.t1:0.26,12.3;
PF08171.6	Mad3_BUB1_II	Mad3/BUB1 homology region 2	211290R.t1:0.093,13.9;211290R.t2:0.094,13.9;247130R.t1:0.13,13.5;
PF10829.3	DUF2554	Protein of unknown function (DUF2554)	079390R.t1:0.21,13.0;
PF06959.6	RecQ5	RecQ helicase protein-like 5 (RecQ5)	010560R.t1:2.4,9.0;
PF11528.3	DUF3224	Protein of unknown function (DUF3224)	256320F.t1:0.052,14.3;
PF08930.5	DUF1912	Domain of unknown function (DUF1912)	031150R.t1:0.12,13.7;136270R.t1:0.38,12.1;
PF10911.3	DUF2717	Protein of unknown function (DUF2717)	054010R.t1:0.0037,18.0;174800R.t1:0.18,12.6;234390R.t1:0.19,12.5;210520F.t1:0.36,11.6;
PF01537.12	Herpes_glycop_D	Herpesvirus glycoprotein D/GG/GX domain	254850F.t1:0.013,16.7;250780F.t1:0.048,14.9;
PF07592.6	DDE_Tnp_ISAZ013	Rhodopirellula transposase DDE domain	179600R.t1:0.00016,21.8;135700F.t1:0.3,11.1;
PF05230.6	MASE2	MASE2 domain	233990R.t1:8.1,7.7;
PF13511.1	DUF4124	Domain of unknown function (DUF4124)	106320F.t5:0.075,14.3;106320F.t4:0.078,14.3;106320F.t3:0.091,14.1;106320F.t1:0.093,14.0;106320F.t2:0.1,13.9;071780R.t1:0.21,12.9;
PF01278.15	Omptin	Omptin family	027380R.t5:0.00046,20.7;027380R.t3:0.0011,19.5;027380R.t1:0.0013,19.2;
PF11040.3	DGF-1_C	Dispersed gene family protein 1 of Trypanosoma cruzi C-terminus	264500F.t1:0.029,15.5;254380R.t1:0.074,14.2;181780R.t1:0.84,10.8;134000R.t1:0.85,10.8;048200R.t1:2,9.6;
PF08027.6	Albumin_I	Albumin I	062700R.t1:0.02,15.9;
PF04674.7	Phi_1	Phosphate-induced protein 1 conserved region	099750R.t1:0.26,11.7;
PF02505.9	MCR_D	Methyl-coenzyme M reductase operon protein D	182720F.t1:0.12,13.2;
PF07043.8	DUF1328	Protein of unknown function (DUF1328)	155900F.t1:0.048,14.9;260410R.t1:0.39,12.0;100790R.t1:2.4,9.5;
PF03562.12	MltA	MltA specific insert domain	144700R.t1:0.2,12.6;
PF13795.1	HupE_UreJ_2	HupE / UreJ protein	025120R.t1:3.4,8.4;
PF06334.6	Orthopox_A47	Orthopoxvirus A47 protein	227830R.t3:4.5,7.6;227830R.t2:5.3,7.3;
PF11733.3	NP1-WLL	Non-capsid protein NP1	205900R.t1:7.4,8.2;
PF13044.1	DUF3904	Protein of unknown function (DUF3904)	289300F.t1:0.49,10.0;
PF11623.3	DUF3252	Protein of unknown function (DUF3252)	010600R.t1:6.6e-10,39.5;
PF06684.6	AA_synth	Amino acid synthesis	066630F.t1:0.028,15.0;033070F.t1:0.05,14.2;
PF04404.7	ERF	ERF superfamily	082530F.t1:0.07,13.9;134300R.t1:0.14,12.9;278690R.t1:0.36,11.6;229290R.t4:8.5,7.1;229290R.t3:9,7.1;229290R.t6:9,7.1;229290R.t2:9,7.1;229290R.t1:9,7.1;
PF12962.2	DUF3851	Protein of unknown function (DUF3851)	125610F.t3:3.9,8.7;125610F.t1:4.3,8.6;125610F.t2:4.4,8.6;
PF03923.8	Lipoprotein_16	Uncharacterized lipoprotein	180190F.t1:0.7,10.5;
PF06314.6	ADC	Acetoacetate decarboxylase (ADC)	281210R.t1:0.32,11.6;
PF06306.6	CgtA	Beta-1,4-N-acetylgalactosaminyltransferase (CgtA)	009350F.t1:0.29,11.6;
PF07314.6	DUF1461	Protein of unknown function (DUF1461)	227080F.t1:0.43,11.6;
PF13386.1	DsbD_2	Cytochrome C biogenesis protein transmembrane region	008090R.t1:0.36,11.8;008100F.t1:0.52,11.3;
PF06435.6	DUF1079	Repeat of unknown function (DUF1079)	187900R.t1:0.83,10.9;074640R.t1:4.4,8.6;
PF15538.1	Toxin_61	Putative toxin 61	175280R.t1:0.057,14.7;029300R.t1:0.14,13.4;
PF07603.6	DUF1566	Protein of unknown function (DUF1566)	053580F.t1:0.042,14.9;
PF05366.6	Sarcolipin	Sarcolipin	139880F.t1:0.93,10.2;282040R.t1:3.3,8.4;139900R.t1:7.3,7.3;
PF08888.6	HopJ	HopJ type III effector protein	077680F.t1:0.056,14.7;
PF02509.9	Rota_NS35	Rotavirus non-structural protein 35	119840F.t1:0.16,12.0;
PF03409.10	Glycoprotein	Transmembrane glycoprotein	150400R.t1:0.37,10.7;
PF12288.3	CsoS2_M	Carboxysome shell peptide mid-region	231390F.t1:0.22,11.9;
PF03420.8	Peptidase_U9	Prohead core protein protease	200650R.t1:0.13,12.7;
PF09228.5	Prok-TraM	Prokaryotic Transcriptional repressor TraM	117290R.t1:0.22,12.9;014310R.t1:0.39,12.1;286410F.t1:0.4,12.1;093590F.t1:0.95,10.9;055900R.t1:1.3,10.5;
PF01378.12	IgG_binding_B	B domain	233800F.t1:0.012,16.6;
PF11389.3	Porin_OmpL1	Leptospira porin protein OmpL1	049980R.t1:0.034,14.5;
PF10621.4	FpoO	F420H2 dehydrogenase subunit FpoO	120050F.t1:0.0012,20.1;262670F.t1:0.096,14.0;075940R.t1:0.14,13.5;160820F.t1:0.14,13.5;017650R.t1:0.21,12.9;
PF15592.1	Imm22	Immunity protein 22	271080R.t1:0.55,11.8;
PF06620.6	DUF1150	Protein of unknown function (DUF1150)	221470R.t2:0.14,13.2;221470R.t1:0.19,12.8;
PF09212.5	CBM27	Carbohydrate binding module 27	296960R.t1:0.18,13.1;
PF08684.5	ocr	DNA mimic ocr	298330R.t1:0.4,12.0;
PF11394.3	DUF2875	Protein of unknown function (DUF2875)	270830R.t1:0.43,10.4;
PF14345.1	GDYXXLXY	GDYXXLXY protein	044290F.t1:0.21,12.7;
PF06619.6	DUF1149	Protein of unknown function (DUF1149)	209930R.t1:0.00078,20.6;
PF13550.1	Phage-tail_3	Putative phage tail protein	259540F.t1:0.19,12.7;
PF12042.3	RP1-2	Tubuliform egg casing silk strands structural domain	195710F.t1:0.55,11.1;131470R.t1:3,8.7;
PF01533.11	Tospo_nucleocap	Tospovirus nucleocapsid protein	087610F.t1:0.11,13.0;
PF12365.3	DUF3649	Protein of unknown function (DUF3649)	245980F.t1:0.082,13.7;
PF05991.6	NYN_YacP	YacP-like NYN domain	051050F.t1:2.3,9.2;
PF09076.5	Crystall_2	Beta/Gamma crystallin	216350R.t1:1.6,9.8;
PF14856.1	Hce2	Pathogen effector; putative necrosis-inducing factor	051180R.t2:0.013,16.6;051180R.t1:0.014,16.6;051180R.t3:0.015,16.4;
PF01831.12	Peptidase_C16	Peptidase C16 family	141930F.t1:0.2,12.4;
PF12117.3	DUF3580	Protein of unknown function (DUF3580)	277630R.t1:0.017,16.3;112740R.t1:0.018,16.3;
PF07342.6	DUF1474	Protein of unknown function (DUF1474)	131370F.t1:0.29,12.6;
PF06251.6	Caps_synth_GfcC	Capsule biosynthesis GfcC	288880F.t1:0.048,14.1;168920R.t1:0.18,12.2;246160R.t1:0.25,11.8;
PF10008.4	DUF2251	Uncharacterized protein conserved in bacteria (DUF2251)	105170R.t1:0.23,12.9;
PF07109.6	Mg-por_mtran_C	Magnesium-protoporphyrin IX methyltransferase C-terminus	151520R.t1:0.033,15.5;240620R.t1:0.19,13.0;
PF04205.9	FMN_bind	FMN-binding domain	044710R.t1:0.022,16.2;063700F.t1:0.032,15.6;197920F.t1:0.32,12.4;
PF06243.6	PaaB	Phenylacetic acid degradation B	040640R.t1:0.044,15.2;152010R.t1:0.28,12.6;
PF09348.5	DUF1990	Domain of unknown function (DUF1990)	204670R.t1:0.31,11.9;
PF02768.10	DNA_pol3_beta_3	DNA polymerase III beta subunit, C-terminal domain	013250F.t1:0.21,12.4;
PF04613.9	LpxD	UDP-3-O-[3-hydroxymyristoyl] glucosamine N-acyltransferase, LpxD	187830F.t2:0.024,15.4;187830F.t1:0.026,15.3;187830F.t3:0.038,14.8;169130F.t2:0.34,11.7;169130F.t3:0.35,11.7;169130F.t1:0.36,11.6;
PF05944.7	Phage_term_smal	Phage small terminase subunit	302420F.t1:0.66,10.9;
PF14496.1	NEL	C-terminal novel E3 ligase, LRR-interacting	217700R.t1:0.18,12.3;
PF11173.3	DUF2960	Protein of unknown function (DUF2960)	150860F.t3:1.4,10.5;150860F.t2:1.4,10.5;150860F.t1:1.4,10.5;
PF11178.3	DUF2963	Protein of unknown function (DUF2963)	143360F.t1:0.022,15.4;
PF14628.1	DUF4454	Domain of unknown function (DUF4454)	112270F.t1:0.14,13.0;
PF03429.8	MSP1b	Major surface protein 1B	028450F.t1:0.02,14.1;
PF09284.5	RhgB_N	Rhamnogalacturonase B, N-terminal	071460F.t1:0.069,13.8;
PF12988.2	DUF3872	Domain of unknown function, B. Theta Gene description (DUF3872)	072440F.t1:0.022,15.5;
PF09438.5	DUF2017	Domain of unknown function (DUF2017)	236520F.t2:0.027,15.3;
PF07559.9	FlaE	Flagellar basal body protein FlaE	189240R.t1:1.3,10.9;
PF11008.3	DUF2846	Protein of unknown function (DUF2846)	079500F.t1:0.00045,21.3;079500F.t2:0.00047,21.2;
PF07122.6	VLPT	Variable length PCR target protein (VLPT)	068440F.t1:2.5e-05,25.1;
PF09020.5	YopE_N	YopE, N terminal	009660R.t1:0.82,11.0;
PF04833.10	COBRA	COBRA-like protein	244910R.t1:6.7e-07,30.5;100130R.t1:0.19,12.8;180270R.t1:0.19,12.7;
PF06934.6	CTI	Fatty acid cis/trans isomerase (CTI)	299810R.t1:0.14,11.6;
PF03458.8	UPF0126	UPF0126 domain	108570R.t1:2.7,8.9;
PF09484.5	Cas_TM1802	CRISPR-associated protein TM1802 (cas_TM1802)	189180R.t1:0.29,10.9;
PF03393.11	Pneumo_matrix	Pneumovirus matrix protein	112620F.t2:0.16,12.2;112620F.t1:0.16,12.1;112610F.t2:0.22,11.7;112610F.t1:0.23,11.7;
PF11937.3	DUF3455	Protein of unknown function (DUF3455)	252630R.t2:0.16,13.1;
PF03217.9	SLAP	Bacterial surface layer protein	192840F.t1:0.28,12.6;287200R.t1:0.93,10.9;075270R.t1:1.1,10.7;182460F.t1:2,9.8;075280R.t1:2.1,9.8;
PF01109.12	GM_CSF	Granulocyte-macrophage colony-stimulating factor	201000R.t1:0.44,11.8;
PF12136.3	RNA_pol_Rpo13	RNA polymerase Rpo13 subunit HTH domain	279170F.t1:0.44,11.5;
PF08489.6	DUF1743	Domain of unknown function (DUF1743)	233190F.t1:0.21,12.6;198420R.t4:0.38,11.8;301060F.t1:0.41,11.6;
PF01995.11	DUF128	Domain of unknown function DUF128	041150F.t1:0.00097,19.4;
PF11276.3	DUF3078	Protein of unknown function (DUF3078)	003710F.t1:0.21,13.0;
PF14530.1	DUF4439	Domain of unknown function (DUF4439)	223360F.t1:1.1,11.0;
PF11419.3	DUF3194	Protein of unknown function (DUF3194)	114540R.t1:0.065,14.7;
PF05798.6	Phage_FRD3	Bacteriophage FRD3 protein	269260F.t1:0.0059,18.1;
PF12286.3	DUF3622	Protein of unknown function (DUF3622)	045910F.t2:0.081,14.5;045910F.t1:0.082,14.5;
PF08175.7	SspO	Small acid-soluble spore protein O family	261390F.t4:0.007,17.9;261390F.t2:0.12,14.0;261390F.t1:0.14,13.7;
PF00718.15	Polyoma_coat	Polyomavirus coat protein	292980F.t1:0.3,11.2;
PF14035.1	YlzJ	YlzJ-like protein	101580F.t1:0.081,14.2;
PF09232.5	Caenor_Her-1	Caenorhabditis elegans Her-1	279880R.t1:0.13,13.6;
PF06954.6	Resistin	Resistin	292770R.t1:0.017,16.6;230510F.t1:0.11,14.0;083150R.t1:0.14,13.7;
PF03549.9	Tir_receptor_M	Translocated intimin receptor (Tir) intimin-binding domain	200590F.t1:0.2,13.0;
PF01964.13	ThiC	ThiC family	155990R.t1:0.11,12.2;057720R.t3:0.13,12.0;
PF06151.8	Trehalose_recp	Trehalose receptor	213630R.t1:0.095,12.3;
PF07165.6	DUF1397	Protein of unknown function (DUF1397)	035290F.t1:0.19,12.2;
PF04200.7	Lipoprotein_17	Lipoprotein associated domain	099620F.t3:0.17,13.3;099620F.t1:0.23,12.9;
PF07940.8	Hepar_II_III	Heparinase II/III-like protein	232560F.t1:0.26,12.4;
PF03196.8	DUF261	Protein of unknown function, DUF261	140520R.t1:0.19,13.0;
PF13100.1	OstA_2	OstA-like protein	221910R.t1:0.1,13.2;
PF07876.7	Dabb	Stress responsive A/B Barrel Domain	157290F.t1:0.32,12.7;
PF13168.1	Poxvirus_B22R_C	Poxvirus B22R protein C-terminal	262420R.t2:0.17,12.4;262420R.t1:0.46,11.0;044320R.t1:1.3,9.6;044330R.t1:1.4,9.4;
PF05613.6	Herpes_U15	Human herpesvirus U15 protein	210070R.t1:0.076,14.6;
PF12223.3	DUF3602	Protein of unknown function (DUF3602)	169770R.t1:0.23,13.1;
PF04459.7	DUF512	Protein of unknown function (DUF512)	214670F.t1:0.18,12.1;
PF09501.5	Bac_small_YrzI	Probable sporulation protein (Bac_small_yrzI)	108860R.t1:0.23,12.6;250470F.t1:5.5,8.2;
PF10605.4	3HBOH	3HB-oligomer hydrolase (3HBOH)	104140F.t1:0.01,15.3;
PF07769.9	PsiF_repeat	psiF repeat	138530R.t1:0.63,10.9;
PF12112.3	DUF3579	Protein of unknown function (DUF3579)	112610F.t2:0.061,14.5;112610F.t1:0.062,14.5;112620F.t2:0.19,12.9;112620F.t1:0.19,12.9;044100F.t1:0.39,11.9;
PF09884.4	DUF2111	Uncharacterized protein conserved in archaea (DUF2111)	210070R.t1:0.21,12.7;
PF02024.10	Leptin	Leptin	105920F.t1:1,10.3;
PF02288.10	Dehydratase_MU	Dehydratase medium subunit	239360R.t1:0.0044,18.0;
PF04474.7	DUF554	Protein of unknown function (DUF554)	097600F.t2:0.034,14.6;097600F.t1:0.039,14.4;
PF06729.7	CENP-R	Kinetochore component, CENP-R	080280R.t1:0.018,16.0;080280R.t2:0.026,15.4;133200R.t2:0.087,13.8;255980F.t1:0.12,13.3;268710R.t1:2.9,8.8;
PF14785.1	MalF_P2	Maltose transport system permease protein MalF P2 domain	124770F.t1:0.064,14.4;
PF08979.6	DUF1894	Domain of unknown function (DUF1894)	093920F.t1:0.08,14.2;
PF14266.1	DUF4356	Domain of unknown function (DUF4356)	235510F.t1:0.061,13.0;122200R.t1:0.065,12.9;060990F.t1:0.083,12.6;
PF11681.3	DUF3277	Protein of unknown function (DUF3277)	026410R.t1:0.25,12.1;026410R.t2:2.2,9.0;
PF12383.3	SARS_3b	Severe acute respiratory syndrome coronavirus 3b protein	252530R.t1:0.16,13.2;
PF00912.17	Transgly	Transglycosylase	027230F.t1:0.094,13.3;
PF06559.6	DCD	2'-deoxycytidine 5'-triphosphate deaminase (DCD)	269410R.t1:0.017,14.8;
PF08918.5	PhoQ_Sensor	PhoQ Sensor	286150R.t1:0.33,11.7;
PF03856.8	SUN	Beta-glucosidase (SUN family)	054440F.t1:0.18,12.3;
PF01737.12	Ycf9	YCF9	180390R.t2:0.31,11.7;
PF07437.6	YfaZ	YfaZ precursor	205280F.t1:0.23,12.2;
PF06587.6	DUF1137	Protein of unknown function (DUF1137)	104890F.t1:0.036,15.0;
PF09300.5	Tecti-min-caps	Tectiviridae, minor capsid	021950F.t2:0.26,12.3;021950F.t1:0.28,12.3;
PF14711.1	Nitr_red_bet_C	Respiratory nitrate reductase beta C-terminal	232890R.t2:0.00078,20.2;232890R.t1:0.00083,20.1;001890R.t2:0.003,18.3;001890R.t1:0.015,16.1;
PF11677.3	DUF3273	Protein of unknown function (DUF3273)	270880R.t1:0.099,13.2;
PF01225.20	Mur_ligase	Mur ligase family, catalytic domain	052780F.t1:0.54,11.6;
PF06222.6	Phage_TAC	Phage tail assembly chaperone	085070R.t1:0.14,13.0;121290F.t1:0.38,11.6;121290F.t2:0.38,11.6;
PF13391.1	HNH_2	HNH endonuclease	052910R.t1:0.0055,17.7;
PF13057.1	DUF3919	Protein of unknown function (DUF3919)	183340R.t1:0.4,11.4;
PF11342.3	DUF3144	Protein of unknown function (DUF3144)	157960F.t1:6,8.3;
PF11954.3	DUF3471	Domain of unknown function (DUF3471)	233470F.t1:0.054,14.6;
PF05829.7	Adeno_PX	Adenovirus late L2 mu core protein (Protein X)	251430F.t3:7.5,7.4;
PF10599.4	Nup_retrotrp_bd	Retro-transposon transporting motif	217900R.t1:0.043,15.7;
PF08478.5	POTRA_1	POTRA domain, FtsQ-type	245360F.t1:0.28,12.5;
PF07212.6	Hyaluronidase_1	Hyaluronidase protein (HylP)	213430F.t1:0.033,14.5;213430F.t3:0.23,11.7;
PF08960.5	DUF1874	Domain of unknown function (DUF1874)	241290F.t1:0.00069,20.6;241220R.t2:0.0013,19.7;241220R.t1:0.0014,19.6;
PF11150.3	DUF2927	Protein of unknown function (DUF2927)	266980F.t2:0.27,12.2;093920F.t1:0.49,11.3;
PF12533.3	Neuro_bHLH	Neuronal helix-loop-helix transcription factor	229380F.t2:1.1e-19,72.7;229380F.t1:1.2e-19,72.6;
PF08173.6	YbgT_YccB	Membrane bound YbgT-like protein	276050F.t1:0.18,12.9;
PF13798.1	PCYCGC	Protein of unknown function with PCYCGC motif	289500F.t1:0.63,11.0;
PF07822.6	Toxin_13	Neurotoxin B-IV-like protein	026280R.t1:3.3,8.9;
PF06992.6	Phage_lambda_P	Replication protein P	225520R.t2:0.0011,19.6;225520R.t1:0.0012,19.5;
PF09040.6	H-K_ATPase_N	Gastric H+/K+-ATPase, N terminal domain	166310F.t4:0.2,13.0;166310F.t2:0.21,13.0;166310F.t3:0.21,13.0;166310F.t1:0.22,12.9;
PF02923.10	BamHI	Restriction endonuclease BamHI	088610R.t1:0.02,16.1;
PF08677.5	GP11	GP11 baseplate wedge protein	053130F.t1:0.12,12.8;
PF09984.4	DUF2222	Uncharacterized signal transduction histidine kinase domain (DUF2222)	039210F.t1:0.27,11.9;
PF07925.6	RdRP_5	Reovirus RNA-dependent RNA polymerase lambda 3	185220F.t1:0.11,11.1;093740R.t1:0.13,11.0;
PF07112.6	DUF1368	Protein of unknown function (DUF1368)	080650R.t1:0.13,12.1;
PF15633.1	Tox-ART-HYD1	HYD1 signature containing ADP-ribosyltransferase	042170F.t1:0.0096,17.9;042190F.t1:0.031,16.3;
PF09938.4	DUF2170	Uncharacterized protein conserved in bacteria (DUF2170)	294670F.t1:0.0014,19.3;148680F.t1:0.14,12.8;064330F.t1:0.51,10.9;147390R.t1:0.61,10.7;289070F.t1:0.75,10.4;
PF07044.6	DUF1329	Protein of unknown function (DUF1329)	047880R.t1:0.79,9.9;
PF08012.6	DUF1702	Protein of unknown function (DUF1702)	150660F.t1:0.064,13.1;
PF00336.13	DNA_pol_viral_C	DNA polymerase (viral) C-terminal domain	146330R.t1:0.13,12.8;088710F.t1:0.15,12.6;210690F.t1:0.15,12.6;
PF03140.10	DUF247	Plant protein of unknown function	172850F.t1:0.023,15.0;
PF10039.4	DUF2275	Predicted integral membrane protein (DUF2275)	083150R.t1:0.33,12.1;
PF00593.19	TonB_dep_Rec	TonB dependent receptor	259200R.t1:0.15,13.3;
PF00674.13	DUP	DUP family	159160F.t1:2.4,9.4;
PF10124.4	Mu-like_gpT	Mu-like prophage major head subunit gpT	014510R.t1:3.1,8.0;
PF02365.10	NAM	No apical meristem (NAM) protein	236220R.t1:0.029,15.8;
PF11988.3	Dsl1_N	Retrograde transport protein Dsl1 N terminal	174840R.t1:0.0078,16.4;013730R.t3:0.026,14.7;013730R.t2:0.029,14.5;
PF15579.1	Imm32	Immunity protein 32	057690F.t1:0.035,14.9;
PF05801.6	DUF840	Lagovirus protein of unknown function (DUF840)	148780F.t3:0.4,12.1;
PF07231.7	Hs1pro-1_N	Hs1pro-1 N-terminus	126630R.t2:0.093,13.6;126630R.t4:0.14,13.0;126630R.t1:0.15,12.9;
PF03944.9	Endotoxin_C	delta endotoxin	241700R.t1:0.0082,17.5;
PF14098.1	SSPI	Small, acid-soluble spore protein I	276050F.t1:0.22,12.7;
PF01338.13	Bac_thur_toxin	Bacillus thuringiensis toxin	042730F.t2:5.2e-05,23.9;042730F.t1:5.5e-05,23.8;042730F.t3:6.6e-05,23.5;174820R.t1:0.035,14.6;
PF13293.1	DUF4074	Domain of unknown function (DUF4074)	302370R.t2:0.0046,18.4;302370R.t1:0.011,17.2;
PF10679.4	DUF2491	Protein of unknown function (DUF2491)	026910F.t1:0.0048,17.2;
PF05733.6	Tenui_N	Tenuivirus/Phlebovirus nucleocapsid protein	045530F.t1:0.15,12.6;
PF10916.3	DUF2712	Protein of unknown function (DUF2712)	100910F.t1:4.4,8.5;
PF00532.16	Peripla_BP_1	Periplasmic binding proteins and sugar binding domain of LacI family	050950R.t1:0.22,12.0;
PF07736.6	CM_1	Chorismate mutase type I	027380R.t4:0.23,12.8;027380R.t3:0.33,12.3;027380R.t1:0.39,12.1;027380R.t2:0.39,12.1;
PF09570.5	RE_SinI	SinI restriction endonuclease	299460F.t2:0.12,12.6;299460F.t1:0.12,12.6;
PF04785.7	Rhabdo_M2	Rhabdovirus matrix protein M2	064520R.t1:0.33,11.2;
PF09691.5	PulS_OutS	Bacterial chaperone lipoprotein (PulS_OutS)	088610R.t1:0.29,12.4;
PF11399.3	DUF3192	Protein of unknown function (DUF3192)	008770F.t1:0.18,13.0;
PF15495.1	Fimbrillin_C	Major fimbrial subunit protein type IV, Fimbrillin, C-terminal	036350F.t1:0.21,13.0;
PF10739.4	DUF2550	Protein of unknown function (DUF2550)	113560R.t1:0.43,11.8;
PF15119.1	APOC4	Apolipoprotein C4	263180R.t1:0.041,15.1;
PF12957.2	DUF3846	Domain of unknown function (DUF3846)	269370F.t2:0.13,13.2;269370F.t1:0.22,12.5;
PF09250.6	Prim-Pol	Bifunctional DNA primase/polymerase, N-terminal	155620F.t1:0.083,14.1;
PF03525.9	Meiotic_rec114	Meiotic recombination protein rec114	099450R.t1:0.55,10.0;
PF04540.8	Herpes_UL51	Herpesvirus UL51 protein	086020R.t1:0.31,11.9;
PF01767.11	Birna_VP3	Birnavirus VP3 protein	146520F.t2:0.22,12.4;037710R.t1:0.33,11.8;
PF08095.6	Toxin_25	Hefutoxin family	005480F.t1:1.8,9.6;
PF11472.3	DUF3206	Protein of unknown function (DUF3206)	222320R.t1:0.023,15.7;
PF09199.5	DUF1954	Domain of unknown function (DUF1954)	158470F.t1:0.24,12.9;
PF14275.1	DUF4362	Domain of unknown function (DUF4362)	015880F.t1:0.021,16.1;
PF11220.3	DUF3015	Protein of unknown function (DUF3015)	153550R.t1:0.12,13.3;
PF09222.5	Fim-adh_lectin	Fimbrial adhesin F17-AG, lectin domain	205660F.t1:0.12,13.0;
PF08396.5	Toxin_34	Spider toxin omega agatoxin/Tx1 family	301250R.t1:0.012,17.4;133280R.t1:0.06,15.1;
PF13178.1	DUF4005	Protein of unknown function (DUF4005)	199940F.t1:0.07,14.6;
PF12019.3	GspH	Type II transport protein GspH	197150F.t1:0.03,15.7;043800R.t1:2,9.8;
PF00897.12	Orbi_VP7	Orbivirus inner capsid protein VP7	233720R.t1:0.027,14.7;233740R.t1:0.038,14.2;068350F.t1:0.42,10.8;014810F.t1:0.49,10.6;
PF12882.2	NUT_C	NUT protein C terminal	220040F.t1:0.00017,22.5;064230F.t1:0.0026,18.6;079270R.t1:0.0044,17.9;173060R.t1:0.0046,17.8;034130R.t3:0.0055,17.6;027600R.t1:0.012,16.5;079230R.t1:0.022,15.6;086670F.t1:0.049,14.5;281530F.t1:0.06,14.2;110180R.t1:0.064,14.1;190600R.t1:0.16,12.9;191450R.t1:0.19,12.6;156450R.t1:0.23,12.3;191440R.t1:0.66,10.8;091190R.t1:7.6,7.4;
PF12342.3	DUF3640	Protein of unknown function (DUF3640)	132370F.t1:0.13,13.1;198620F.t1:2.4,9.0;
PF04522.7	DUF585	Protein of unknown function (DUF585)	031990F.t1:0.051,14.2;
PF08467.5	Luteo_P1-P2	Luteovirus RNA polymerase P1-P2/replicase	143090F.t1:0.045,13.8;173090F.t1:0.064,13.3;
PF12168.3	DNA_pol3_tau_4	DNA polymerase III subunits tau domain IV DnaB-binding	019600F.t1:0.17,13.6;
PF09633.5	DUF2023	Protein of unknown function (DUF2023)	195880R.t1:0.21,12.8;
PF03319.8	EutN_CcmL	Ethanolamine utilisation protein EutN/carboxysome	133500F.t4:0.00012,23.6;133500F.t1:0.13,13.9;133500F.t3:0.18,13.4;133500F.t2:0.24,13.1;133500F.t5:2.7,9.7;
PF09830.4	ATP_transf	ATP adenylyltransferase	179340F.t1:0.34,12.0;
PF07868.6	DUF1655	Protein of unknown function (DUF1655)	272940F.t1:0.98,10.7;272940F.t3:1.2,10.4;272940F.t2:1.9,9.8;
PF09832.4	DUF2059	Uncharacterized protein conserved in bacteria (DUF2059)	153080R.t1:0.36,12.1;291130F.t1:0.94,10.8;292600R.t1:1.3,10.3;
PF10648.4	Gmad2	Immunoglobulin-like domain of bacterial spore germination	277340R.t1:0.015,16.7;245990R.t2:0.095,14.1;245990R.t1:0.12,13.9;177920F.t1:0.16,13.4;223760R.t2:0.16,13.4;223760R.t1:0.17,13.3;
PF06761.7	IcmF-related	Intracellular multiplication and human macrophage-killing	262410F.t1:0.1,13.2;
PF03415.9	Peptidase_C11	Clostripain family	298190R.t1:0.038,14.2;008630F.t1:0.062,13.6;
PF15293.1	NUFIP2	Nuclear fragile X mental retardation-interacting protein 2	072440F.t1:0.35,10.8;059690R.t2:7.4,6.4;
PF03521.9	Kv2channel	Kv2 voltage-gated K+ channel	287380R.t3:0.28,11.9;
PF04501.7	Baculo_VP39	Baculovirus major capsid protein VP39	036140F.t1:1,9.6;
PF07070.6	Spo0M	SpoOM protein	162780F.t1:0.0008,20.1;
PF15654.1	Tox-WTIP	Toxin with a conserved tryptophan and TIP tripeptide motif	093020R.t1:1.8,9.5;
PF14290.1	DUF4370	Domain of unknown function (DUF4370)	049570F.t1:0.38,11.5;
PF14254.1	DUF4348	Domain of unknown function (DUF4348)	112240F.t1:0.48,10.8;
PF03780.8	Asp23	Asp23 family	072690F.t1:0.04,15.4;
PF05908.6	DUF867	Protein of unknown function (DUF867)	141200R.t1:0.033,14.5;002930R.t1:0.23,11.8;002930R.t2:0.23,11.8;
PF10522.4	RII_binding_1	RII binding domain	130810F.t1:7.3,8.3;
PF01232.18	Mannitol_dh	Mannitol dehydrogenase Rossmann domain	254180R.t1:1.4,10.1;254180R.t2:1.4,10.1;
PF14020.1	DUF4236	Protein of unknown function (DUF4236)	241440R.t1:1.3,10.4;
PF07335.6	Glyco_hydro_75	Fungal chitosanase of glycosyl hydrolase group 75	114850F.t1:0.077,14.1;
PF01558.13	POR	Pyruvate ferredoxin/flavodoxin oxidoreductase	261750F.t1:0.0051,18.0;223150R.t1:0.26,12.5;272380F.t1:0.29,12.3;
PF00500.13	Late_protein_L1	L1 (late) protein	051010R.t1:0.058,13.2;
PF11341.3	DUF3143	Protein of unknown function (DUF3143)	150010R.t1:0.056,14.6;150010R.t2:0.51,11.5;
PF14390.1	DUF4420	Domain of unknown function (DUF4420)	168450R.t1:0.4,10.7;
PF11401.3	Tetrabrachion	Tetrabrachion	282130R.t1:3.1,8.9;
PF09583.5	Phageshock_PspG	Phage shock protein G (Phageshock_PspG)	026190R.t1:0.045,15.1;
PF09002.6	DUF1887	Domain of unknown function (DUF1887)	048400R.t1:0.05,13.3;284080R.t1:0.17,11.5;
PF13222.1	DUF4030	Protein of unknown function (DUF4030)	283250F.t1:4.3,8.3;
PF11601.3	Shal-type	Shal-type voltage-gated potassium channels	010570R.t1:1.8e-12,47.7;
PF13070.1	DUF3934	Protein of unknown function (DUF3934)	016830F.t1:0.52,11.8;
PF05973.9	Gp49	Phage derived protein Gp49-like (DUF891)	078920R.t1:0.02,16.2;027720R.t1:0.52,11.6;
PF13852.1	DUF4197	Protein of unknown function (DUF4197)	122740R.t1:0.066,14.0;
PF04966.7	OprB	Carbohydrate-selective porin, OprB family	256380R.t2:0.34,11.3;256380R.t1:0.38,11.1;
PF02216.11	B	B domain	023100R.t1:0.21,12.6;
PF06891.6	P2_Phage_GpR	P2 phage tail completion protein R (GpR)	286940R.t8:0.33,12.0;286940R.t5:0.36,11.9;
PF13060.1	DUF3921	Protein of unknown function (DUF3921)	013520F.t2:0.031,15.4;013520F.t1:0.038,15.1;174400F.t1:0.24,12.5;
PF11198.3	DUF2857	Protein of unknown function (DUF2857)	113470R.t1:0.25,12.1;
PF13022.1	HTH_Tnp_1_2	Helix-turn-helix of insertion element transposase	142100F.t1:0.4,11.7;
PF06097.6	DUF945	Bacterial protein of unknown function (DUF945)	175910F.t1:0.21,11.6;045200F.t1:3.5,7.6;
PF07370.6	DUF1489	Protein of unknown function (DUF1489)	127670F.t1:0.27,12.0;
PF00544.14	Pec_lyase_C	Pectate lyase	223750R.t2:0.19,12.5;223750R.t1:0.19,12.4;
PF10768.4	FliX	Class II flagellar assembly regulator	091850F.t1:0.22,13.0;247650F.t1:0.23,12.9;
PF04250.8	DUF429	Protein of unknown function (DUF429)	113480F.t1:0.078,13.5;
PF12476.3	DUF3696	Protein of unknown function (DUF3696)	063610F.t1:3.4,9.0;063610F.t2:6.9,8.0;
PF06451.6	Moricin	Moricin	044080F.t1:0.48,11.2;044080F.t2:0.48,11.2;
PF09048.5	Cro	Cro	157210R.t1:0.33,11.9;046210F.t2:0.52,11.2;
PF11901.3	DUF3421	Protein of unknown function (DUF3421)	107250R.t1:0.17,12.9;
PF05558.7	DREPP	DREPP plasma membrane polypeptide	226650F.t1:0.083,14.0;226660F.t1:0.27,12.3;204660F.t1:0.43,11.7;
PF04160.7	Borrelia_orfX	Orf-X protein	293500F.t1:0.85,10.7;
PF10881.3	DUF2726	Protein of unknown function (DUF2726)	254620R.t1:0.6,11.0;
PF14329.1	DUF4386	Domain of unknown function (DUF4386)	136460R.t1:0.03,15.1;
PF08845.5	SymE_toxin	Toxin SymE, type I toxin-antitoxin system	211350F.t3:0.21,12.7;211350F.t1:0.24,12.5;
PF10649.4	DUF2478	Protein of unknown function (DUF2478)	129920R.t1:1.4,9.5;
PF10855.3	DUF2648	Protein of unknown function (DUF2648)	131470R.t1:0.033,14.8;
PF07827.6	KNTase_C	KNTase C-terminal domain	220950R.t1:0.018,16.1;061260R.t1:0.17,12.9;
PF15648.1	Tox-REase-5	Restriction endonuclease fold toxin 5	053580F.t1:0.058,14.9;210970F.t1:0.27,12.8;
PF06438.7	HasA	Heme-binding protein A (HasA)	209360F.t1:0.43,11.2;
PF07417.7	Crl	Transcriptional regulator Crl	130900R.t1:0.037,15.0;209860R.t1:0.051,14.6;180330R.t1:0.82,10.7;180300R.t1:6.7,7.7;
PF09899.4	DUF2126	Putative amidoligase enzyme (DUF2126)	299280F.t1:0.086,12.1;
PF12204.3	DUF3598	Domain of unknown function (DUF3598)	044520R.t1:0.38,11.2;
PF14230.1	DUF4333	Domain of unknown function (DUF4333)	021680F.t1:0.0026,18.9;029270R.t3:0.12,13.6;029270R.t1:0.12,13.6;029270R.t2:0.12,13.5;
PF07733.7	DNA_pol3_alpha	Bacterial DNA polymerase III alpha subunit	124660F.t1:0.002,17.9;121900F.t3:0.065,13.0;121900F.t1:0.073,12.8;121900F.t2:0.077,12.7;060590R.t1:2.8,7.5;
PF03737.10	Methyltransf_6	Demethylmenaquinone methyltransferase	010600R.t1:0.00045,21.4;227830R.t2:0.0073,17.5;227830R.t3:0.089,13.9;
PF15545.1	Toxin_67	Putative toxin 67	042120R.t1:0.14,13.3;
PF10532.4	Plant_all_beta	Plant specific N-all beta domain	298150F.t1:0.13,13.6;
PF04414.7	tRNA_deacylase	D-aminoacyl-tRNA deacylase	138750F.t1:0.023,15.1;
PF09574.5	DUF2374	Protein of unknown function (Duf2374)	090060R.t1:4.2,8.3;
PF09839.4	DUF2066	Uncharacterized protein conserved in bacteria (DUF2066)	055860R.t1:0.2,12.0;
PF12982.2	DUF3866	Protein of unknown function (DUF3866)	180570R.t1:0.029,14.6;297840F.t1:0.45,10.7;
PF06474.7	MLTD_N	MltD lipid attachment motif	132960F.t1:1.1,10.7;
PF03865.8	ShlB	Haemolysin secretion/activation protein ShlB/FhaC/HecB	229880F.t1:0.024,14.7;
PF09529.5	Intg_mem_TP0381	Integral membrane protein (intg_mem_TP0381)	072240F.t1:2.4,8.6;
PF12418.3	AcylCoA_DH_N	Acyl-CoA dehydrogenase N terminal	237670R.t1:0.15,13.0;237700R.t1:0.15,13.0;
PF06228.8	ChuX_HutX	Haem utilisation ChuX/HutX	080510F.t2:0.23,12.1;080510F.t1:0.25,12.0;
PF11612.3	T2SJ	Type II secretion system (T2SS), protein J	185680F.t1:0.31,12.0;
PF05939.8	Phage_min_tail	Phage minor tail protein	076100F.t1:0.34,12.1;
PF12744.2	ATG19_autophagy	Autophagy protein Atg19, Atg8-binding	075350R.t1:8.2e-08,33.1;182460F.t1:3.9e-05,24.3;075340R.t1:5e-05,24.0;075330R.t1:0.0026,18.3;254720F.t3:0.0041,17.7;254720F.t2:0.0041,17.7;254720F.t1:0.0041,17.7;266800F.t1:0.023,15.2;205560F.t1:0.12,12.8;180760F.t1:0.13,12.8;075290R.t1:0.13,12.8;287140F.t1:0.18,12.3;059150F.t1:0.23,11.9;287420F.t1:0.24,11.9;205590F.t1:0.26,11.8;287250R.t1:0.29,11.7;195010F.t1:0.3,11.6;075270R.t1:0.3,11.6;
PF10847.3	DUF2656	Protein of unknown function (DUF2656)	265160F.t1:2e-06,29.0;
PF07117.6	DUF1373	Protein of unknown function (DUF1373)	122530R.t2:4.2,8.3;122530R.t1:4.3,8.3;
PF02604.14	PhdYeFM_antitox	Antitoxin Phd_YefM, type II toxin-antitoxin system	007670F.t1:0.29,12.0;
PF12236.3	Head-tail_con	Bacteriophage head to tail connecting protein	089690F.t1:0.14,11.8;
PF14583.1	Pectate_lyase22	Oligogalacturonate lyase	009390R.t1:0.25,11.0;
PF15356.1	SPR1	Psoriasis susceptibility locus 2	152960F.t1:1,11.0;
PF11159.3	DUF2939	Protein of unknown function (DUF2939)	045450F.t1:0.27,12.7;080340R.t2:0.48,11.9;
PF11251.3	DUF3050	Protein of unknown function (DUF3050)	175880F.t1:0.1,13.1;
PF06998.6	DUF1307	Protein of unknown function (DUF1307)	089410R.t1:0.044,15.1;
PF05079.7	DUF680	Protein of unknown function (DUF680)	139500R.t1:0.0034,19.1;
PF02063.12	MARCKS	MARCKS family	098810F.t1:0.0041,18.3;121490F.t1:0.8,10.8;
PF14556.1	AF2331-like	AF2331-like	131820F.t1:0.4,12.3;049090F.t1:0.47,12.1;
PF05323.7	Pox_A21	Poxvirus A21 Protein	121130R.t1:0.19,13.4;079450F.t3:0.34,12.6;079450F.t2:0.4,12.3;079450F.t1:0.45,12.2;079450F.t4:0.52,12.0;
PF10042.4	DUF2278	Uncharacterized conserved protein (DUF2278)	259520F.t1:0.13,13.3;
PF09998.4	DUF2239	Uncharacterized protein conserved in bacteria (DUF2239)	289450F.t1:0.13,13.1;026800R.t1:0.22,12.4;
PF09226.6	Endonuc-HincII	Restriction endonuclease HincII	160690F.t2:0.26,11.9;
PF07180.6	DUF1401	Protein of unknown function (DUF1401)	191960F.t1:0.12,13.3;
PF05732.6	RepL	Firmicute plasmid replication protein (RepL)	279470F.t2:0.1,13.1;279470F.t1:0.1,13.1;
PF07187.6	DUF1405	Protein of unknown function (DUF1405)	136570R.t1:0.043,14.8;
PF14683.1	CBM-like	Polysaccharide lyase family 4, domain III	290900F.t1:0.053,14.4;
PF11739.3	DctA-YdbH	Dicarboxylate transport	171050F.t1:0.31,11.7;
PF11429.3	Colicin_D	Colicin D	053310F.t1:0.65,11.4;
PF08982.6	DUF1857	Domain of unknown function (DUF1857)	075640F.t1:0.64,10.9;
PF10578.4	SVS_QK	Seminal vesicle protein repeat	053630R.t1:0.91,11.2;053630R.t3:1.9,10.2;053630R.t2:2,10.1;
PF02371.11	Transposase_20	Transposase IS116/IS110/IS902 family	178250R.t2:2e-05,25.8;178250R.t1:2.1e-05,25.8;178250R.t4:2.1e-05,25.8;178250R.t5:0.044,15.1;
PF12953.2	DUF3842	Domain of unknown function (DUF3842)	249200F.t1:0.066,14.6;
PF13026.1	DUF3887	Protein of unknown function (DUF3887)	132480F.t1:0.16,13.5;036010R.t1:0.59,11.7;
PF10736.4	DUF2527	Protein of unknown function (DUF2627)	168970R.t1:0.16,12.8;
PF11405.3	Inhibitor_I67	Bromelain inhibitor VI	127280R.t1:0.2,13.0;
PF00363.13	Casein	Casein	206440R.t1:3.6,9.5;
PF06429.8	Flg_bbr_C	Flagellar basal body rod FlgEFG protein C-terminal	093920F.t1:0.043,15.0;
PF08974.5	DUF1877	Domain of unknown function (DUF1877)	092870F.t1:0.084,13.8;
PF15218.1	SPATA25	Spermatogenesis-associated protein 25	107190F.t1:0.033,14.9;186650F.t1:0.12,13.1;
PF02943.10	FeThRed_B	Ferredoxin thioredoxin reductase catalytic beta chain	143510R.t1:0.92,10.5;
PF06219.7	DUF1005	Protein of unknown function (DUF1005)	045410F.t1:1.5,8.7;
PF08893.5	DUF1839	Domain of unknown function (DUF1839)	089560R.t1:0.076,13.3;088990F.t1:0.2,11.9;
PF02946.9	GTF2I	GTF2I-like repeat	052510R.t1:2.5e-11,44.5;015840F.t1:2.4e-09,38.1;011540R.t1:3.3e-09,37.7;157120R.t1:9.3e-08,33.1;221430F.t2:1e-07,32.9;221430F.t1:1e-07,32.9;221430F.t3:1e-07,32.9;157120R.t2:1.2e-07,32.6;034170F.t3:3.2e-07,31.3;146550F.t1:3.6e-07,31.2;263330R.t1:6.1e-07,30.4;034170F.t1:9.6e-07,29.8;034170F.t2:2.5e-05,25.3;184320F.t1:0.00014,22.9;231430R.t1:0.00015,22.8;299200F.t1:0.00017,22.6;299080R.t1:0.00033,21…
PF09966.4	DUF2200	Uncharacterized protein conserved in bacteria (DUF2200)	091740R.t1:2.7,9.1;
PF02316.11	HTH_Tnp_Mu_1	Mu DNA-binding domain	102130R.t1:0.013,16.5;102130R.t2:0.014,16.4;
PF12218.3	End_N_terminal	N terminal extension of bacteriophage endosialidase	156380F.t1:0.42,11.4;
PF14030.1	DUF4245	Protein of unknown function (DUF4245)	071390R.t2:0.024,15.7;071390R.t1:0.024,15.6;
PF04996.7	AstB	Succinylarginine dihydrolase	181830F.t1:0.14,12.2;
PF14419.1	SPOUT_MTase_2	AF2226-like SPOUT RNA Methylase fused to THUMP	081180F.t1:0.042,14.3;
PF06896.6	DUF1268	Protein of unknown function (DUF1268)	046540R.t1:0.04,15.5;
PF01882.13	DUF58	Protein of unknown function DUF58	110710R.t13:0.23,12.9;
PF05298.6	Bombinin	Bombinin	219080F.t1:0.037,14.7;040840F.t1:0.18,12.5;043740R.t1:0.35,11.6;077150R.t1:0.39,11.5;
PF08388.6	GIIM	Group II intron, maturase-specific domain	001070R.t1:0.91,10.6;
PF07232.6	DUF1424	Putative rep protein (DUF1424)	129350F.t1:0.078,13.0;
PF15415.1	DUF4622	Protein of unknown function (DUF4622)	284350F.t1:3.1,7.8;
PF11115.3	DUF2623	Protein of unknown function (DUF2623)	058270F.t1:0.003,18.7;
PF00862.14	Sucrose_synth	Sucrose synthase	052250F.t5:0.36,10.0;
PF12636.2	DUF3781	Protein of unknown function (DUF3781)	047670R.t1:0.045,15.0;044290F.t1:1.2,10.4;
PF03374.9	ANT	Phage antirepressor protein KilAC domain	112120F.t1:0.036,15.4;211910F.t1:0.26,12.6;
PF01524.12	Gemini_V1	Geminivirus V1 protein	161660R.t1:0.1,13.8;
PF03700.8	Sorting_nexin	Sorting nexin, N-terminal domain	126230R.t1:0.13,13.7;
PF10742.4	DUF2555	Protein of unknown function (DUF2555)	181630F.t1:0.24,12.3;043340F.t1:0.5,11.3;043340F.t2:0.55,11.2;043340F.t3:0.6,11.0;
PF06059.7	DUF930	Domain of Unknown Function (DUF930)	232300F.t1:0.15,13.5;232300F.t3:0.21,13.1;
PF00182.14	Glyco_hydro_19	Chitinase class I	236200R.t1:6.3,7.7;
PF12163.3	HobA	DNA replication regulator	125510R.t1:0.28,11.7;
PF11268.3	DUF3071	Protein of unknown function (DUF3071)	047220R.t1:0.011,16.7;300260R.t1:0.18,12.8;
PF06737.9	Transglycosylas	Transglycosylase-like domain	288860R.t1:0.35,12.4;085960F.t1:0.57,11.8;
PF10438.4	Cyc-maltodext_C	Cyclo-malto-dextrinase C-terminal domain	211360R.t1:6.4,8.2;
PF07976.7	Phe_hydrox_dim	Phenol hydroxylase, C-terminal dimerisation domain	118900F.t3:0.023,15.5;118900F.t1:0.093,13.6;
PF12623.2	Hen1_L	RNA repair, ligase-Pnkp-associating, region of Hen1	054440F.t1:0.048,13.7;
PF09622.5	DUF2391	Putative integral membrane protein (DUF2391)	098170F.t1:0.00033,21.2;
PF13323.1	HPIH	N-terminal domain with HPIH motif	252860R.t3:5.7,7.9;252860R.t2:5.9,7.8;252860R.t1:9.2,7.2;
PF05590.6	DUF769	Xylella fastidiosa protein of unknown function (DUF769)	058880F.t1:1.4,9.3;
PF01397.16	Terpene_synth	Terpene synthase, N-terminal domain	227230R.t1:0.019,15.7;
PF09093.6	Lyase_catalyt	Lyase, catalytic	229060F.t1:0.36,10.9;
PF05481.7	Myco_19_kDa	Mycobacterium 19 kDa lipoprotein antigen	080910R.t1:0.00031,21.9;080900R.t1:0.0027,18.8;076010R.t1:0.099,13.7;
PF04311.8	DUF459	Protein of unknown function (DUF459)	097480R.t1:0.12,12.5;
PF13275.1	S4_2	S4 domain	302710F.t1:0.15,13.0;294980R.t1:0.2,12.5;069360F.t1:0.24,12.3;
PF07891.7	DUF1666	Protein of unknown function (DUF1666)	230800F.t1:4.1,8.0;
PF09514.5	SSXRD	SSXRD motif	214450F.t1:0.75,10.4;
PF12139.3	APS-reductase_C	Adenosine-5'-phosphosulfate reductase beta subunit	209730F.t1:0.18,13.2;
PF13389.1	DUF4107	Protein of unknown function (DUF4107)	144540F.t1:0.4,11.6;
PF05655.6	AvrD	Pseudomonas avirulence D protein (AvrD)	177050R.t1:0.054,13.6;177080R.t1:0.059,13.5;177070R.t1:0.19,11.9;
PF03100.10	CcmE	CcmE	236250F.t2:0.18,12.6;236250F.t1:0.21,12.4;
PF10030.4	DUF2272	Uncharacterized protein conserved in bacteria (DUF2272)	222300R.t1:0.1,13.3;
PF09344.5	Cas_CT1975	CT1975-like protein	045700R.t2:0.43,11.2;
PF08906.6	DUF1851	Domain of unknown function (DUF1851)	281930F.t1:0.21,12.9;
PF09413.5	DUF2007	Domain of unknown function (DUF2007)	005410R.t1:0.16,13.0;
PF09065.5	Haemadin	Haemadin	276740F.t1:0.011,16.5;
PF02600.11	DsbB	Disulfide bond formation protein DsbB	097820F.t2:3.8,8.5;
PF07759.7	DUF1615	Protein of unknown function (DUF1615)	187370R.t1:0.054,13.5;
PF12702.2	Lipocalin_3	Lipocalin-like	245910R.t2:0.19,13.0;
PF03831.9	PhnA	PhnA protein	194400F.t1:0.24,12.1;
PF09136.5	Glucodextran_B	Glucodextranase, domain B	102650F.t1:0.049,15.1;020570F.t1:4.8,8.7;
PF09008.5	Head_binding	Head binding	067180F.t1:0.011,17.0;232440F.t1:2.2,9.6;232440F.t2:2.9,9.2;
PF12790.2	T6SS-SciN	Type VI secretion lipoprotein	251160F.t1:0.0012,19.8;192900R.t1:0.006,17.5;101030F.t1:0.01,16.7;170410F.t1:0.016,16.0;129400F.t1:0.046,14.6;037250R.t1:0.1,13.5;114120F.t3:0.13,13.1;160440R.t3:0.13,13.1;160440R.t2:0.13,13.1;160440R.t1:0.13,13.1;243270F.t1:0.15,12.9;114120F.t2:0.16,12.8;
PF06614.6	Neuromodulin	Neuromodulin	054660F.t1:1,10.5;207410F.t1:1.6,9.9;027370F.t1:1.8,9.7;243610F.t1:5.5,8.2;
PF07758.6	DUF1614	Protein of unknown function (DUF1614)	255820R.t1:0.22,12.5;
PF05367.6	Phage_endo_I	Phage endonuclease I	022310R.t1:0.44,11.2;
PF15530.1	Toxin_50	Putative toxin 50	239410R.t2:0.09,13.9;
PF09843.4	DUF2070	Predicted membrane protein (DUF2070)	240870R.t1:0.34,11.6;
PF13171.1	DUF4004	Protein of unknown function (DUF4004)	191540F.t1:0.098,14.1;
PF15171.1	Spexin	Neuropeptide secretory protein family, NPQ, spexin	300300F.t1:0.19,13.0;
PF01468.12	GA	GA module	152820F.t1:2.1,9.8;072280F.t1:4.1,8.9;
PF15572.1	Imm26	Immunity protein 26	242070F.t1:0.24,12.8;
PF04039.8	MnhB	Domain related to MnhB subunit of Na+/H+ antiporter	060890R.t1:0.013,16.8;060890R.t2:0.013,16.8;
PF11880.3	DUF3400	Domain of unknown function (DUF3400)	173600R.t2:0.00022,21.6;144300R.t1:0.023,15.1;
PF09951.4	DUF2185	Protein of unknown function (DUF2185)	114260F.t1:0.23,12.5;170500F.t1:0.3,12.2;179600R.t1:0.53,11.4;
PF15507.1	DUF4649	Domain of unknown function (DUF4649)	203230R.t1:0.15,13.1;
PF15445.1	ATS	acidic terminal segments, variant surface antigen of PfEMP1	080640R.t2:0.062,13.7;080640R.t1:0.065,13.6;
PF04485.7	NblA	Phycobilisome degradation protein nblA	169270R.t1:0.0039,18.3;063500R.t3:3.2,9.0;
PF10443.4	RNA12	RNA12 protein	059530F.t1:0.038,13.8;
PF06045.6	Rhamnogal_lyase	Rhamnogalacturonate lyase family	193770F.t1:0.028,15.0;
PF11042.3	DUF2750	Protein of unknown function (DUF2750)	091120R.t1:0.23,12.8;
PF00980.12	Rota_Capsid_VP6	Rotavirus major capsid protein VP6	056160F.t1:0.23,11.3;
PF06140.8	Ifi-6-16	Interferon-induced 6-16 family	133500F.t5:0.22,12.6;133500F.t4:7.7,7.6;
PF05952.7	ComX	Bacillus competence pheromone ComX	050250F.t1:0.23,12.2;
PF10093.4	DUF2331	Uncharacterized protein conserved in bacteria (DUF2331)	192320F.t1:0.1,12.6;
PF05880.6	Fiji_64_capsid	Fijivirus 64 kDa capsid protein	238540F.t1:0.21,11.2;
PF11087.3	DUF2881	Protein of unknown function (DUF2881)	271380F.t1:6.4,7.6;
PF03924.8	CHASE	CHASE domain	100250R.t1:0.29,11.6;
PF00477.12	LEA_5	Small hydrophilic plant seed protein	195470F.t1:0.88,11.1;
PF01723.11	Chorion_1	Chorion protein	009680F.t1:0.078,14.1;
PF15525.1	DUF4652	Domain of unknown function (DUF4652)	288660F.t1:0.0012,19.6;
PF02286.10	Dehydratase_LU	Dehydratase large subunit	245760F.t1:0.32,10.5;245760F.t3:0.33,10.4;
PF11195.3	DUF2829	Protein of unknown function (DUF2829)	289340F.t5:0.083,14.6;289340F.t1:3.3,9.5;
PF12417.3	DUF3669	Zinc finger protein	015160R.t1:0.0093,16.9;116520R.t1:0.025,15.6;179030R.t1:0.093,13.7;
PF14156.1	AbbA_antirepres	Antirepressor AbbA	052130R.t1:0.028,15.3;
PF02707.11	MOSP_N	Major Outer Sheath Protein N-terminal region	137710R.t1:0.094,13.6;
PF05382.8	Amidase_5	Bacteriophage peptidoglycan hydrolase	108680R.t1:0.47,11.3;
PF13752.1	DUF4165	Domain of unknown function (DUF4165)	252070R.t1:0.08,14.0;
PF07167.8	PhaC_N	Poly-beta-hydroxybutyrate polymerase (PhaC) N-terminus	277550F.t1:0.099,13.3;302670F.t1:0.12,13.0;
PF02821.11	Staphylokinase	Staphylokinase/Streptokinase family	185930R.t1:0.053,14.6;137470F.t1:1.7,9.7;137470F.t3:1.8,9.7;
PF10963.3	DUF2765	Protein of unknown function (DUF2765)	140200F.t1:0.17,13.1;
PF06006.7	DUF905	Bacterial protein of unknown function (DUF905)	031630F.t1:0.11,13.1;220750F.t1:0.3,11.7;236890R.t1:0.32,11.6;
PF11487.3	RestrictionSfiI	Type II restriction enzyme SfiI	209960R.t2:0.15,12.4;
PF11097.3	DUF2883	Protein of unknown function (DUF2883)	108250R.t2:0.15,13.4;
PF06018.9	CodY	CodY GAF-like domain	258200R.t1:0.15,12.6;
PF08734.6	GYD	GYD domain	147220F.t1:0.091,13.7;
PF13027.1	DUF3888	Protein of unknown function (DUF3888)	032940F.t1:0.091,13.9;
PF14741.1	GH114_assoc	N-terminal glycosyl-hydrolase-114-associated domain	040250R.t2:0.23,12.4;
PF01830.13	Peptidase_C7	Peptidase C7 family	281580R.t1:6.3e-05,23.5;086060F.t1:0.073,13.5;
PF08838.5	DUF1811	Protein of unknown function (DUF1811)	233850F.t2:3.6,8.8;
PF13146.1	TRL	TRL-like protein family	210790R.t1:0.033,15.4;
PF03714.9	PUD	Bacterial pullanase-associated domain	217560F.t2:0.21,13.0;217560F.t1:0.22,12.9;
PF13048.1	DUF3908	Protein of unknown function (DUF3908)	094020F.t1:0.29,12.4;
PF10539.4	Dev_Cell_Death	Development and cell death domain	066200F.t2:0.17,12.7;066200F.t1:0.18,12.7;237400R.t1:0.28,12.0;
PF04723.9	GRDA	Glycine reductase complex selenoprotein A	087330R.t5:0.00068,20.6;087330R.t4:0.011,16.7;087330R.t3:0.012,16.6;087330R.t2:0.012,16.5;075840R.t1:0.016,16.2;087330R.t1:0.017,16.1;081150F.t1:0.78,10.7;
PF11805.3	DUF3326	Protein of unknown function (DUF3326)	283580F.t1:0.073,13.1;
PF11361.3	DUF3159	Protein of unknown function (DUF3159)	108820R.t1:0.023,15.5;108820R.t6:0.76,10.5;229160R.t1:1.2,9.8;
PF01993.13	MTD	methylene-5,6,7,8-tetrahydromethanopterin dehydrogenase	193680R.t3:0.27,11.5;
PF14208.1	DUF4320	Domain of unknown function (DUF4320)	299980R.t1:0.27,12.4;233870R.t1:1.2,10.3;
PF11795.3	DUF3322	Uncharacterized protein conserved in bacteria N-term (DUF3322)	194560F.t1:0.012,16.5;
PF10942.3	DUF2619	Protein of unknown function (DUF2619)	161400F.t1:0.14,13.3;201240R.t1:0.15,13.3;
PF14524.1	Wzt_C	Wzt C-terminal domain	057710F.t1:0.16,12.9;
PF03338.10	Pox_J1	Poxvirus J1 protein	297600R.t1:0.031,15.2;
PF08050.7	Tet_res_leader	Tetracycline resistance leader peptide	133350R.t2:0.063,14.1;133350R.t1:0.13,13.2;
PF01502.13	PRA-CH	Phosphoribosyl-AMP cyclohydrolase	174920F.t1:0.18,12.7;
PF07825.6	Exc	Excisionase-like protein	160410F.t1:0.34,11.9;
PF10728.4	DUF2520	Domain of unknown function (DUF2520)	149240F.t1:0.21,12.3;
PF14090.1	HTH_39	Helix-turn-helix domain	051980F.t2:0.044,14.5;
PF10470.4	AKAP7_RIRII_bdg	PKA-RI-RII subunit binding domain of A-kinase anchor protein	175270R.t1:0.055,14.6;
PF05858.7	BIV_Env	Bovine immunodeficiency virus surface protein (SU)	139390R.t1:0.25,10.5;
PF10817.3	DUF2563	Protein of unknown function (DUF2563)	257190R.t1:0.084,14.6;
PF11432.3	DUF3197	Protein of unknown function (DUF3197)	160500R.t1:0.33,12.2;
PF09042.6	Titin_Z	Titin Z	168570F.t1:0.67,10.8;
PF10795.4	DUF2607	Protein of unknown function (DUF2607)	067280R.t1:0.06,14.4;
PF00767.13	Poty_coat	Potyvirus coat protein	060590R.t1:6.7,7.2;
PF09605.5	Trep_Strep	Hypothetical bacterial integral membrane protein (Trep_Strep)	139890R.t1:1,10.3;
PF10625.4	UspB	Universal stress protein B (UspB)	179600R.t1:0.059,14.4;167040F.t2:3.1,8.9;
PF12367.3	PFO_beta_C	Pyruvate ferredoxin oxidoreductase beta subunit C terminal	130900R.t1:0.38,12.0;185400R.t1:8,7.7;
PF02447.11	GntP_permease	GntP family permease	286460R.t1:0.023,14.5;
PF14491.1	DUF4435	Protein of unknown function (DUF4435)	139230R.t1:0.00025,22.2;
PF03698.8	UPF0180	Uncharacterised protein family (UPF0180)	139340F.t1:0.24,12.5;
PF01891.11	CbiM	Cobalt uptake substrate-specific transmembrane region	038270F.t1:0.26,12.1;
PF03397.9	Rhabdo_matrix	Rhabdovirus matrix protein	001120F.t1:0.15,12.6;
PF12055.3	DUF3536	Domain of unknown function (DUF3536)	083840F.t1:0.0035,17.8;180270R.t1:0.0039,17.7;302450F.t1:0.0043,17.5;130900R.t1:0.0074,16.8;241290F.t1:0.022,15.2;180340R.t1:0.073,13.5;241240R.t1:0.31,11.4;241220R.t2:0.57,10.6;241220R.t1:0.57,10.6;241200R.t1:2,8.8;
PF03519.9	Invas_SpaK	Invasion protein B family	169660F.t1:0.29,12.3;
PF11493.3	TSP9	Thylakoid soluble phosphoprotein TSP9	053120F.t1:0.52,12.1;
