# Supplementary material for: A Phylogenomic Framework and Divergence History of Cephalochordata Amphioxus
Source: Front Physiol. 2018 Dec 18;9:1833. doi: 10.3389/fphys.2018.01833 (PMC6305399; doi:10.3389/fphys.2018.01833)
Supplement: TABLE S4 — Information of lineage-specific domains in Branchiostoma floridae. [file Table_4.xlsx]

## Sheet: bfo.pfama
Table S4 Information of lineage-specific domains in Branchiostoma floridae.
Pfam id	Pfam name	Pfam description	Align info(alu)
PF07745.8	Glyco_hydro_53	Glycosyl hydrolase family 53	PACid462564:0.044,13.5;PACid469029:0.17,11.5;
PF08143.6	CBFNT	CBFNT (NUC161) domain	PACid477055:0.31,13.0;
PF07233.7	DUF1425	Protein of unknown function (DUF1425)	PACid489974:0.074,13.5;
PF07519.6	Tannase	Tannase and feruloyl esterase	PACid479918:0.14,11.7;
PF08637.5	NCA2	ATP synthase regulation protein NCA2	PACid466642:0.0051,16.6;
PF07520.6	SrfB	Virulence factor SrfB	PACid487186:0.11,10.9;
PF05144.9	Phage_CRI	Phage replication protein CRI	PACid450505:0.084,12.9;
PF08814.5	XisH	XisH protein	PACid462997:6.1e-06,27.2;
PF12843.2	DUF3820	Protein of unknown function (DUF3820)	PACid449482:0.0029,18.1;
PF00820.14	Lipoprotein_1	Borrelia lipoprotein	PACid490049:0.031,14.2;PACid457859:0.094,12.7;PACid457863:0.14,12.1;
PF06510.6	DUF1102	Protein of unknown function (DUF1102)	PACid484407:0.25,12.0;
PF01761.15	DHQ_synthase	3-dehydroquinate synthase	PACid475882:0.0028,17.5;
PF07485.6	DUF1529	Domain of Unknown Function (DUF1259)	PACid445708:0.0081,16.8;
PF10452.4	TCO89	TORC1 subunit TCO89	PACid475950:0.025,14.4;
PF11507.3	Transcript_VP30	Ebola virus-specific transcription factor VP30	PACid474282:0.26,12.0;
PF14999.1	Shadoo	Shadow of prion protein, neuroprotective	PACid441606:2.6,8.8;
PF08714.6	Fae	Formaldehyde-activating enzyme (Fae)	PACid484367:0.1,13.2;
PF09290.6	AcetDehyd-dimer	Prokaryotic acetaldehyde dehydrogenase, dimerisation	PACid450922:0.0086,16.9;
PF12887.2	SICA_alpha	SICA extracellular alpha domain	PACid450357:0.0005,20.8;PACid450358:0.026,15.2;
PF14406.1	Bacteroid_pep	Ribosomally synthesized peptide in Bacteroidetes	PACid450935:0.16,13.0;PACid479741:0.38,11.8;
PF11052.3	Tr-sialidase_C	Trans-sialidase of Trypanosoma hydrophobic C-terminal	PACid465947:7.5,7.4;
PF09061.1	Stirrup	Stirrup	PACid446115:0.04,14.7;PACid484642:0.083,13.7;
PF03930.9	Flp_N	Recombinase Flp protein N-terminus	PACid460083:0.25,12.0;
PF06195.8	DUF996	Protein of unknown function (DUF996)	PACid458012:0.26,12.1;PACid473375:2.5,9.0;
PF04348.8	LppC	LppC putative lipoprotein	PACid458622:0.44,9.9;
PF08404.5	Baculo_p74_N	Baculoviridae P74 N-terminal	PACid490648:0.19,11.4;
PF09678.5	Caa3_CtaG	Cytochrome c oxidase caa3 assembly factor (Caa3_CtaG)	PACid461278:0.013,15.3;
PF13209.1	DUF4017	Protein of unknown function (DUF4017)	PACid441586:0.1,13.2;PACid472201:2.1,9.1;
PF10448.4	chaperone_DMP	20S proteasome chaperone	PACid473830:0.022,15.5;PACid450710:0.13,13.0;
PF08110.7	Antimicrobial15	Ocellatin family	PACid472016:0.28,12.1;
PF07362.7	CcdA	Post-segregation antitoxin CcdA	PACid448148:0.28,12.0;
PF13726.1	Na_H_antiport_2	Na+-H+ antiporter family	PACid488229:0.26,12.1;
PF12563.3	Hemolysin_N	Hemolytic toxin N terminal	PACid447003:0.11,12.8;
PF03025.9	Papilloma_E5	Papillomavirus E5	PACid477369:0.44,11.4;PACid477370:1.3,9.9;
PF03664.8	Glyco_hydro_62	Glycosyl hydrolase family 62	PACid449345:1.7e-10,41.4;
PF00434.13	VP7	Glycoprotein VP7	PACid475469:0.35,10.6;
PF07958.6	DUF1688	Protein of unknown function (DUF1688)	PACid458814:0.15,11.5;
PF11654.3	DUF2665	Protein of unknown function (DUF2665)	PACid477128:0.00061,20.2;PACid484384:0.46,11.0;
PF12359.3	DUF3645	Protein of unknown function (DUF3645)	PACid462654:0.41,10.7;PACid442057:9.4,6.3;
PF11532.3	HnRNP_M	Heterogeneous nuclear ribonucleoprotein M	PACid484515:2,9.5;
PF15265.1	FAM196	FAM196 family	PACid450524:1.4,9.0;
PF09098.5	Dehyd-heme_bind	Quinohemoprotein amine dehydrogenase A, alpha subunit, haem binding	PACid449631:0.16,12.3;
PF12532.3	DUF3732	Protein of unknown function (DUF3732)	PACid483523:0.067,13.6;
PF05755.7	REF	Rubber elongation factor protein (REF)	PACid443981:0.28,11.8;
PF10987.3	DUF2806	Protein of unknown function (DUF2806)	PACid452775:0.094,13.1;PACid452784:0.15,12.4;PACid452778:0.35,11.2;
PF12138.3	Spherulin4	Spherulation-specific family 4	PACid484400:0.17,12.2;
PF07556.6	DUF1538	Protein of unknown function (DUF1538)	PACid444267:0.19,11.7;
PF09515.5	Thia_YuaJ	Thiamine transporter protein (Thia_YuaJ)	PACid480213:0.05,14.3;
PF12981.2	DUF3865	Domain of Unknown Function with PDB structure (DUF3865)	PACid467968:0.021,15.5;
PF11492.3	Dicistro_VP4	Cricket paralysis virus, VP4	PACid464950:0.0076,17.1;PACid448799:0.066,14.1;PACid481979:0.37,11.7;
PF09197.5	Rap1-DNA-bind	Rap1, DNA-binding	PACid442004:0.28,12.6;
PF11329.3	DUF3131	Protein of unknown function (DUF3131)	PACid476729:0.37,10.3;
PF03641.9	Lysine_decarbox	Possible lysine decarboxylase	PACid474954:0.18,12.5;
PF09796.4	QCR10	Ubiquinol-cytochrome-c reductase complex subunit (QCR10)	PACid481065:0.11,13.0;
PF11533.3	DUF3225	Protein of unknown function (DUF3225)	PACid442055:0.21,12.2;
PF04403.8	PqiA	Paraquat-inducible protein A	PACid443258:0.078,13.4;
PF02745.10	MCR_alpha_N	Methyl-coenzyme M reductase alpha subunit, N-terminal domain	PACid476046:0.063,13.4;
PF10765.4	DUF2591	Protein of unknown function (DUF2591)	PACid470583:0.17,13.0;PACid466467:1.2,10.3;PACid470981:2,9.6;
PF04165.7	DUF401	Protein of unknown function (DUF401)	PACid481208:0.12,12.2;
PF09092.6	Lyase_N	Lyase, N terminal	PACid488370:0.11,13.1;
PF15423.1	FLYWCH_N	FLYWCH-type zinc finger-containing protein	PACid480319:0.02,15.9;PACid471459:0.051,14.6;
PF03309.9	Pan_kinase	Type III pantothenate kinase	PACid475200:0.24,11.7;
PF11449.3	DUF2899	Protein of unknown function (DUF2899)	PACid485940:0.038,14.1;
PF04206.7	MtrE	Tetrahydromethanopterin S-methyltransferase, subunit E	PACid474882:0.19,11.6;
PF14877.1	mIF3	Mitochondrial translation initiation factor	PACid453094:4.4e-05,23.8;
PF07841.8	DM4_12	DM4/DM12 family	PACid440924:0.25,12.5;
PF11869.3	DUF3389	Protein of unknown function (DUF3389)	PACid469886:0.055,14.2;
PF12404.3	DUF3663	Peptidase	PACid469892:0.07,13.8;
PF08720.5	Hema_stalk	Influenza C hemagglutinin stalk	PACid465581:1,9.7;
PF08113.6	CoxIIa	Cytochrome c oxidase subunit IIa family	PACid481915:1.5,9.5;
PF12294.3	DUF3626	Protein of unknown function (DUF3626)	PACid485936:0.14,12.0;
PF10757.4	YbaJ	Biofilm formation regulator YbaJ	PACid460633:0.16,13.0;
PF08896.5	DUF1842	Domain of unknown function (DUF1842)	PACid472153:0.13,12.9;PACid442729:0.16,12.6;PACid486536:0.21,12.2;
PF02088.10	Ornatin	Ornatin	PACid485813:1.2,9.7;
PF03482.8	SIC	sic protein	PACid477743:0.0064,17.0;PACid487670:0.087,13.3;PACid491029:0.23,11.9;
PF12034.3	DUF3520	Domain of unknown function (DUF3520)	PACid446886:0.025,15.6;
PF00845.14	Gemini_BL1	Geminivirus BL1 movement protein	PACid461445:0.05,13.9;
PF09095.6	DUF1926	Domain of unknown function (DUF1926)	PACid456639:0.017,15.3;
PF07507.6	WavE	WavE lipopolysaccharide synthesis	PACid487100:0.12,12.2;
PF11179.3	DUF2967	Protein of unknown function (DUF2967)	PACid455002:9.9,6.4;
PF07153.6	Marek_SORF3	Marek's disease-like virus SORF3 protein	PACid466201:0.021,14.4;
PF02611.10	CDH	CDP-diacylglycerol pyrophosphatase	PACid490697:1.2,9.2;
PF11070.3	DUF2871	Protein of unknown function (DUF2871)	PACid449778:1.7,9.7;
PF14097.1	SpoVAE	Stage V sporulation protein AE1	PACid452097:0.083,13.2;
PF11876.3	DUF3396	Protein of unknown function (DUF3396)	PACid459925:0.022,14.8;
PF04644.7	Motilin_ghrelin	Motilin/ghrelin	PACid475930:0.092,13.4;PACid446701:7.2,7.4;
PF15095.1	IL33	Interleukin 33	PACid482611:0.16,12.3;PACid455692:0.21,11.9;
PF06961.8	DUF1294	Protein of unknown function (DUF1294)	PACid455493:0.18,12.7;
PF09795.4	Atg31	Autophagy-related protein 31	PACid450930:0.011,16.3;
PF03627.8	PapG_N	PapG carbohydrate binding domain	PACid463591:0.064,13.6;
PF12362.3	DUF3646	DNA polymerase III gamma and tau subunits C terminal	PACid444782:0.18,12.6;
PF15200.1	KRTDAP	Keratinocyte differentiation-associated	PACid488431:0.0058,17.2;PACid449978:0.21,12.3;
PF14034.1	Spore_YtrH	Sporulation protein YtrH	PACid474311:0.11,13.4;
PF04303.8	PrpF	PrpF protein	PACid471423:10,5.7;
PF02130.12	UPF0054	Uncharacterized protein family UPF0054	PACid443218:0.3,11.2;
PF12881.2	NUT_N	NUT protein N terminus	PACid489435:0.49,10.4;
PF03072.9	DUF237	MG032/MG096/MG288 family 1	PACid475174:0.25,12.1;
PF01548.12	DEDD_Tnp_IS110	Transposase	PACid459220:1.5e-07,32.1;PACid464264:0.0047,17.5;
PF02232.10	Alpha_TIF	Alpha trans-inducing protein (Alpha-TIF)	PACid487886:0.15,11.7;
PF14612.1	Ino80_Iec3	IEC3 subunit of the Ino80 complex, chromatin re-modelling	PACid449342:1.1,10.1;
PF07105.6	DUF1367	Protein of unknown function (DUF1367)	PACid441095:0.15,12.3;
PF14876.1	RSF	Respiratory growth transcriptional regulator	PACid454883:0.39,10.4;PACid480818:9.5,5.8;
PF14190.1	DUF4313	Domain of unknown function (DUF4313)	PACid491063:0.25,11.9;
PF10875.3	DUF2670	Protein of unknown function (DUF2670)	PACid484490:0.25,12.3;
PF01348.16	Intron_maturas2	Type II intron maturase	PACid445893:0.16,12.8;PACid482671:0.31,11.9;
PF09063.5	Phage_coat	Phage PP7 coat protein	PACid456638:4.9,7.8;
PF09018.6	Phage_Capsid_P3	P3 major capsid protein	PACid450529:0.061,12.8;
PF11154.3	DUF2934	Protein of unknown function (DUF2934)	PACid476875:4.9,7.5;
PF08468.6	MTS_N	Methyltransferase small domain N-terminal	PACid458116:0.13,13.0;
PF06303.7	MatP	Organiser of macrodomain of Terminus of chromosome	PACid482262:0.69,10.7;PACid451926:2.9,8.7;PACid451921:7.9,7.3;
PF12390.3	Se-cys_synth_N	Selenocysteine synthase N terminal	PACid454346:0.1,13.6;
PF02499.10	DNA_pack_C	Probable DNA packing protein, C-terminus	PACid475851:6.7e-05,22.7;PACid453750:0.94,9.0;
PF12109.3	CXCR4_N	CXCR4 Chemokine receptor N terminal	PACid479411:5.9,7.7;
PF15448.1	NTS_2	N-terminal segments of P. falciparum erythrocyte membrane protein	PACid476375:0.11,13.7;
PF06709.6	DUF1196	Protein of unknown function (DUF1196)	PACid457015:7.9e-08,33.0;
PF07957.6	DUF3294	Protein of unknown function (DUF3294)	PACid460528:0.12,12.7;
PF15566.1	Imm18	Immunity protein 18	PACid463573:0.77,10.0;
PF15564.1	Imm13	Immunity protein 13	PACid449144:0.16,12.5;
PF13332.1	Fil_haemagg_2	Haemagluttinin repeat	PACid461578:0.0004,21.1;PACid452648:0.088,13.5;
PF07548.6	ChlamPMP_M	Chlamydia polymorphic membrane protein middle domain	PACid479729:3.3,8.3;
PF14068.1	YuiB	Putative membrane protein	PACid461152:2.6,9.3;
PF10675.4	DUF2489	Protein of unknown function (DUF2489)	PACid462417:0.063,13.8;PACid468756:0.17,12.5;PACid462610:0.31,11.6;
PF12486.3	DUF3702	ImpA domain protein	PACid482262:0.14,12.7;
PF10287.4	DUF2401	Putative TOS1-like glycosyl hydrolase (DUF2401)	PACid489156:0.15,12.4;
PF10103.4	DUF2342	Uncharacterised conserved protein (DUF2342)	PACid451041:0.01,15.7;
PF04865.9	Baseplate_J	Baseplate J-like protein	PACid463814:0.025,14.8;
PF14187.1	DUF4310	Domain of unknown function (DUF4310)	PACid447365:0.034,14.5;
PF09449.5	DUF2020	Domain of unknown function (DUF2020)	PACid489648:1.6e-09,38.5;
PF09391.5	DUF2000	Protein of unknown function (DUF2000)	PACid444110:0.16,12.5;
PF05846.7	Chordopox_A15	Chordopoxvirus A15 protein	PACid441466:0.27,12.2;
PF07706.7	TAT_ubiq	Aminotransferase ubiquitination site	PACid450644:0.15,12.9;
PF15217.1	TSC21	TSC21 family	PACid453088:0.19,12.2;
PF11010.3	DUF2848	Protein of unknown function (DUF2848)	PACid462141:0.16,12.3;
PF11693.3	DUF2990	Protein of unknown function (DUF2990)	PACid450250:0.09,13.5;
PF15430.1	SVWC	Single domain von Willebrand factor type C	PACid488595:0.087,14.1;
PF14268.1	YoaP	YoaP-like	PACid466229:2.6,8.2;
PF00807.12	Apidaecin	Apidaecin	PACid458385:0.016,15.8;
PF09253.5	Ole-e-6	Pollen allergen ole e 6	PACid483991:0.031,14.8;
PF06379.7	RhaT	L-rhamnose-proton symport protein (RhaT)	PACid469639:0.12,12.2;PACid481844:0.16,11.8;
PF06317.6	Arena_RNA_pol	Arenavirus RNA polymerase	PACid457804:0.24,8.9;
PF10783.4	DUF2599	Protein of unknown function (DUF2599)	PACid477128:1,10.9;
PF01520.13	Amidase_3	N-acetylmuramoyl-L-alanine amidase	PACid477043:0.043,14.5;
PF04299.7	FMN_bind_2	Putative FMN-binding domain	PACid457090:0.38,11.1;
PF03795.9	YCII	YCII-related domain	PACid490299:0.064,14.3;
PF10692.4	DUF2498	Protein of unknown function (DUF2498)	PACid460658:0.037,14.5;
PF11631.3	DUF3255	Protein of unknown function (DUF3255)	PACid443194:0.056,13.9;
PF04994.8	TfoX_C	TfoX C-terminal domain	PACid441906:2.9e-06,28.0;
PF00545.15	Ribonuclease	ribonuclease	PACid457593:0.022,15.7;PACid463839:0.058,14.3;
PF07220.6	DUF1420	Protein of unknown function (DUF1420)	PACid471364:0.07,12.4;PACid479395:0.2,10.9;
PF13295.1	DUF4077	Domain of unknown function (DUF4077)	PACid452284:1.1,9.8;
PF10051.4	DUF2286	Uncharacterized protein conserved in archaea (DUF2286)	PACid483523:0.0055,17.2;PACid456954:0.21,12.1;
PF11480.3	ImmE5	Colicin-E5 Imm protein	PACid483801:0.16,12.7;
PF05409.8	Peptidase_C30	Coronavirus endopeptidase C30	PACid465932:0.35,10.8;
PF05578.7	Peptidase_S31	Pestivirus NS3 polyprotein peptidase S31	PACid454188:0.34,11.0;
PF11227.3	DUF3025	Protein of unknown function (DUF3025)	PACid475885:0.064,13.6;
PF10285.4	Luciferase_cat	Luciferase catalytic domain	PACid473828:0.26,11.3;
PF09035.5	Tn916-Xis	Excisionase from transposon Tn916	PACid449717:1.4e-06,29.1;PACid447371:0.28,12.2;
PF07182.6	DUF1402	Protein of unknown function (DUF1402)	PACid488437:0.074,12.8;PACid471251:0.13,12.0;
PF13657.1	Couple_hipA	HipA N-terminal domain	PACid459722:0.19,12.9;
PF15203.1	TMEM95	TMEM95 family	PACid447814:0.04,14.2;PACid472041:0.31,11.3;
PF09160.5	FimH_man-bind	FimH, mannose binding	PACid459913:0.095,13.4;
PF14356.1	DUF4403	Domain of unknown function (DUF4403)	PACid448354:0.0033,16.7;
PF07905.6	PucR	Purine catabolism regulatory protein-like family	PACid462071:0.23,11.9;
PF11920.3	DUF3438	Protein of unknown function (DUF3438)	PACid473817:0.049,13.4;PACid484004:2.1,8.0;
PF06612.6	DUF1146	Protein of unknown function (DUF1146)	PACid464080:0.0085,16.8;
PF02249.12	MCR_alpha	Methyl-coenzyme M reductase alpha subunit, C-terminal domain	PACid445850:0.12,13.3;
PF15131.1	DUF4567	Domain of unknown function (DUF4567)	PACid486656:0.095,13.7;PACid448001:0.99,10.5;
PF06241.7	DUF1012	Protein of unknown function (DUF1012)	PACid485593:0.18,12.2;
PF08837.6	DUF1810	Protein of unknown function (DUF1810)	PACid452949:0.13,12.7;PACid478608:0.26,11.7;
PF06253.6	MTTB	Trimethylamine methyltransferase (MTTB)	PACid450208:0.33,9.5;
PF05058.7	ActA	ActA Protein	PACid444197:0.049,12.5;PACid479558:0.3,9.9;
PF05520.6	Citrus_P18	Citrus tristeza virus P18 protein	PACid443505:0.15,12.5;PACid484001:1.1,9.7;
PF10657.4	RC-P840_PscD	Photosystem P840 reaction centre protein PscD	PACid469274:0.022,15.5;
PF09400.5	DUF2002	Protein of unknown function (DUF2002)	PACid480197:0.058,14.0;PACid453718:0.084,13.5;
PF04070.7	DUF378	Domain of unknown function (DUF378)	PACid489172:0.56,10.7;
PF12969.2	DUF3857	Domain of Unknown Function with PDB structure (DUF3857)	PACid441271:0.04,14.4;
PF00419.15	Fimbrial	Fimbrial protein	PACid484448:1.9e-05,25.8;
PF11638.3	DnaA_N	DnaA N-terminal domain	PACid440802:0.011,16.2;
PF09206.6	ArabFuran-catal	Alpha-L-arabinofuranosidase B, catalytic	PACid489702:3.6,7.3;
PF00950.12	ABC-3	ABC 3 transport family	PACid456091:0.11,12.7;
PF12888.2	Lipid_bd	Lipid-binding putative hydrolase	PACid444197:2.5,8.8;
PF08830.5	DUF1806	Protein of unknown function (DUF1806)	PACid451919:0.061,14.0;PACid468468:0.11,13.2;
PF06231.6	DUF1010	Protein of unknown function (DUF1010)	PACid465339:0.076,13.9;PACid465367:1.3,9.9;
PF08262.6	Lem_TRP	Leucophaea maderae tachykinin-related peptide	PACid488228:0.084,13.5;
PF12544.3	LAM_C	Lysine-2,3-aminomutase	PACid465725:2.1e-05,25.5;PACid443076:0.02,15.8;
PF09115.5	DNApol3-delta_C	DNA polymerase III, delta subunit, C terminal	PACid473075:0.17,12.8;
PF03315.10	SDH_beta	Serine dehydratase beta chain	PACid476452:0.079,13.9;
PF09980.4	DUF2214	Predicted membrane protein (DUF2214)	PACid484460:0.056,14.1;PACid465330:0.34,11.5;PACid470923:1.3,9.6;PACid470945:1.9,9.1;
PF15439.1	NYAP_N	Neuronal tyrosine-phosphorylated phosphoinositide-3-kinase adapter	PACid455213:0.038,14.1;
PF15428.1	Imm14	Immunity protein 14	PACid451139:7.5e-05,24.0;
PF02927.9	CelD_N	N-terminal ig-like domain of cellulase	PACid489300:0.23,12.6;
PF11754.3	Velvet	Velvet factor	PACid483207:0.39,11.2;
PF10993.3	DUF2818	Protein of unknown function (DUF2818)	PACid440856:1.8,10.0;
PF10054.4	DUF2291	Predicted periplasmic lipoprotein (DUF2291)	PACid470552:0.073,13.2;
PF05363.7	Herpes_US12	Herpesvirus US12 family	PACid458930:0.23,12.8;
PF08803.6	ydhR	Putative mono-oxygenase ydhR	PACid468995:1.1e-06,29.5;
PF14888.1	PBP-Tp47_c	Penicillin-binding protein Tp47 domain C	PACid456766:0.0012,19.4;PACid469412:0.33,11.4;PACid454147:0.57,10.7;
PF12863.2	DUF3821	Domain of unknown function (DUF3821)	PACid455165:0.036,14.6;
PF08873.6	DUF1834	Domain of unknown function (DUF1834)	PACid454243:0.11,13.0;
PF01736.11	Polyoma_agno	Polyomavirus agnoprotein	PACid488111:0.053,14.0;
PF11374.3	DUF3176	Protein of unknown function (DUF3176)	PACid447791:0.027,15.2;
PF13379.1	NMT1_2	NMT1-like family	PACid455128:0.11,12.7;
PF07355.7	GRDB	Glycine/sarcosine/betaine reductase selenoprotein B (GRDB)	PACid463767:0.24,11.2;PACid459909:0.34,10.7;
PF09940.4	DUF2172	Domain of unknown function (DUF2172)	PACid483887:0.052,12.8;
PF05684.7	DUF819	Protein of unknown function (DUF819)	PACid490280:0.092,12.4;
PF12293.3	DUF3625	Protein of unknown function (DUF3625)	PACid456449:0.14,12.1;
PF12653.2	DUF3785	Protein of unknown function (DUF3785)	PACid475359:0.29,11.9;
PF14460.1	Prok-E2_D	Prokaryotic E2 family D	PACid483261:0.24,11.7;
PF07151.7	DUF1391	Protein of unknown function (DUF1391)	PACid462335:0.7,10.3;
PF03314.9	DUF273	Protein of unknown function, DUF273	PACid446124:0.14,12.3;
PF13255.1	DUF4046	Protein of unknown function (DUF4046)	PACid450442:0.049,13.3;
PF07104.6	DUF1366	Protein of unknown function (DUF1366)	PACid447447:0.032,14.7;
PF00866.13	Ring_hydroxyl_B	Ring hydroxylating beta subunit	PACid448192:0.043,14.4;PACid461699:1.1,9.9;
PF09614.5	Cas_Csy2	CRISPR-associated protein (Cas_Csy2)	PACid485831:0.15,12.2;
PF11550.3	IglC	Intracellular growth locus C protein	PACid469257:0.11,12.7;
PF08462.5	Carmo_coat_C	Carmovirus coat protein	PACid445757:0.093,13.5;
PF11086.3	DUF2878	Protein of unknown function (DUF2878)	PACid465319:0.0087,16.9;
PF06475.6	Glycolipid_bind	Putative glycolipid-binding	PACid449822:0.3,11.1;
PF12667.2	NigD	NigD-like protein	PACid445264:0.093,13.4;
PF01887.11	SAM_adeno_trans	S-adenosyl-l-methionine hydroxide adenosyltransferase	PACid450963:0.16,11.9;
PF14167.1	YfkD	YfkD-like protein	PACid464301:0.019,14.9;PACid476050:1.1,9.1;
PF11066.3	DUF2867	Protein of unknown function (DUF2867)	PACid478455:0.26,11.9;
PF02084.10	Bindin	Bindin	PACid487379:0.05,14.5;
PF04015.7	DUF362	Domain of unknown function (DUF362)	PACid453057:0.031,14.6;PACid470962:2.2,8.6;
PF00840.15	Glyco_hydro_7	Glycosyl hydrolase family 7	PACid478648:0.09,12.0;
PF05418.6	Apo-VLDL-II	Apovitellenin I (Apo-VLDL-II)	PACid451666:0.0049,17.9;
PF09681.5	Phage_rep_org_N	N-terminal phage replisome organiser (Phage_rep_org_N)	PACid475883:0.1,13.1;
PF02667.9	SCFA_trans	Short chain fatty acid transporter	PACid472589:0.0089,15.7;
PF11231.3	DUF3034	Protein of unknown function (DUF3034)	PACid458283:0.1,12.8;
PF08411.5	Exonuc_X-T_C	Exonuclease C-terminal	PACid453861:0.023,14.6;
PF09167.6	DUF1942	Domain of unknown function (DUF1942)	PACid489137:0.078,13.6;
PF07644.6	PGAMP	Planctomycete PGAMP	PACid443782:0.082,13.5;PACid461479:0.11,13.1;
PF03173.8	CHB_HEX	Putative carbohydrate binding domain	PACid459840:0.32,11.3;
PF09466.5	Yqai	Hypothetical protein Yqai	PACid487498:0.16,12.9;
PF10612.4	Spore-coat_CotZ	Spore coat protein Z	PACid450213:0.047,14.4;
PF15241.1	Cylicin_N	Cylicin N-terminus	PACid447253:0.02,15.6;
PF12676.2	DUF3796	Protein of unknown function (DUF3796)	PACid487978:0.078,14.1;PACid456312:0.67,11.1;PACid484207:1.2,10.3;
PF00475.13	IGPD	Imidazoleglycerol-phosphate dehydratase	PACid467620:0.045,14.5;PACid467621:0.071,13.8;PACid442987:0.21,12.3;PACid468321:7.9,7.2;
PF15127.1	DUF4565	Protein of unknown function (DUF4565)	PACid454992:0.067,14.4;PACid454995:0.21,12.8;
PF14274.1	DUF4361	Domain of unknown function (DUF4361)	PACid466784:0.014,16.0;
PF10043.4	DUF2279	Predicted periplasmic lipoprotein (DUF2279)	PACid480197:0.061,14.5;PACid448392:0.19,12.9;
PF06275.6	DUF1031	Protein of unknown function (DUF1031)	PACid445479:0.00015,22.6;PACid452266:0.0018,19.2;
PF06315.6	AceK	Isocitrate dehydrogenase kinase/phosphatase (AceK)	PACid458954:0.011,15.0;PACid446471:0.12,11.5;
PF02989.9	DUF228	Lyme disease proteins of unknown function	PACid445668:0.054,13.9;
PF03742.9	PetN	PetN	PACid488123:1.6,9.3;
PF01318.13	Bromo_coat	Bromovirus coat protein	PACid440970:6.5,7.3;
PF03000.9	NPH3	NPH3 family	PACid449848:0.1,13.0;
PF14544.1	DUF4443	Domain of unknown function (DUF4443)	PACid459874:0.21,12.3;
PF12155.3	NADHdh-2_N	NADH dehydrogenase subunit 2 N-terminal	PACid457765:0.14,13.2;PACid464529:3.5,8.7;
PF11786.3	Aft1_HRA	Aft1 HRA domain	PACid461880:0.0056,17.8;PACid474443:0.2,12.8;
PF04269.7	DUF440	Protein of unknown function, DUF440	PACid490168:0.35,11.8;
PF04520.8	Senescence_reg	Senescence regulator	PACid447776:0.019,16.3;PACid481577:4.2,8.7;
PF15584.1	Imm44	Immunity protein 44	PACid450857:0.26,12.1;
PF14480.1	DNA_pol3_a_NI	DNA polymerase III polC-type N-terminus I	PACid486945:0.05,14.1;
PF09502.5	HrpB4	Bacterial type III secretion protein (HrpB4)	PACid465592:0.34,10.9;PACid466040:0.4,10.7;
PF11092.3	Alveol-reg_P311	Neuronal protein 3.1 (p311)	PACid484434:0.35,11.7;
PF13128.1	DUF3954	Protein of unknown function (DUF3954)	PACid483626:0.04,14.2;PACid450968:0.11,12.8;PACid441400:0.14,12.5;PACid483621:0.28,11.5;PACid444458:0.86,9.9;
PF00793.15	DAHP_synth_1	DAHP synthetase I family	PACid486041:1.1e-06,28.5;
PF04019.7	DUF359	Protein of unknown function (DUF359)	PACid446734:0.0049,17.1;
PF03688.9	Nepo_coat_C	Nepovirus coat protein, C-terminal domain	PACid448572:0.24,11.9;
PF09883.4	DUF2110	Uncharacterized protein conserved in archaea (DUF2110)	PACid446827:0.022,15.3;
PF02664.10	LuxS	S-Ribosylhomocysteinase (LuxS)	PACid458828:0.011,16.2;PACid477377:0.028,14.8;PACid459934:0.25,11.8;
PF09900.4	DUF2127	Predicted membrane protein (DUF2127)	PACid462608:1.7,9.6;
PF06242.6	DUF1013	Protein of unknown function (DUF1013)	PACid452447:0.073,13.9;
PF07118.6	DUF1374	Protein of unknown function (DUF1374)	PACid471025:0.2,12.7;
PF10904.3	DUF2694	Protein of unknown function (DUF2694)	PACid488566:0.14,13.1;PACid491153:0.32,11.9;
PF06206.6	CpeT	CpeT/CpcT family (DUF1001)	PACid488192:0.028,15.0;
PF04686.7	SsgA	Streptomyces sporulation and cell division protein, SsgA	PACid446124:0.53,10.9;
PF00986.16	DNA_gyraseB_C	DNA gyrase B subunit, carboxyl terminus	PACid476930:0.054,14.1;
PF15340.1	COPR5	Cooperator of PRMT5 family	PACid447457:0.45,11.7;
PF06287.6	DUF1039	Protein of unknown function (DUF1039)	PACid485823:9.8,7.0;
PF08258.6	WWamide	WWamide peptide	PACid459709:10,7.5;
PF03008.9	DUF234	Archaea bacterial proteins of unknown function	PACid463726:0.057,14.4;PACid444736:0.39,11.7;
PF15589.1	Imm12	Immunity protein 12	PACid479248:1.5e-05,25.7;PACid479249:1.2,9.8;
PF08230.6	Cpl-7	Cpl-7 lysozyme C-terminal domain	PACid453948:1.2,9.8;
PF07048.6	DUF1331	Protein of unknown function (DUF1331)	PACid471453:9,6.7;
PF05789.6	Baculo_VP1054	Baculovirus VP1054 protein	PACid443967:0.31,11.1;
PF13682.1	CZB	Chemoreceptor zinc-binding domain	PACid443508:0.12,13.5;PACid491453:3.9,8.6;
PF12626.2	PolyA_pol_arg_C	Polymerase A arginine-rich C-terminus	PACid474363:0.2,12.1;
PF07613.6	DUF1576	Protein of unknown function (DUF1576)	PACid453640:0.23,11.8;
PF08178.6	GnsAB	GnsA/GnsB family	PACid445971:0.32,11.5;
PF08102.6	Antimicrobial_7	Scorpion antimicrobial peptide	PACid482262:0.0044,17.9;PACid488970:0.27,12.1;
PF08868.5	YugN	YugN-like family	PACid466078:0.3,11.6;
PF02159.10	Oest_recep	Oestrogen receptor	PACid445636:0.14,13.2;
PF11747.3	RebB	Killing trait	PACid479361:0.19,12.5;PACid450596:1.7,9.5;
PF04552.8	Sigma54_DBD	Sigma-54, DNA binding domain	PACid475506:0.37,11.2;
PF07708.6	Tash_PEST	Tash protein PEST motif	PACid485239:0.041,14.6;
PF11033.3	ComJ	Competence protein J (ComJ)	PACid485339:0.00088,19.8;
PF12121.3	DD_K	Dermaseptin	PACid471938:0.27,12.0;PACid455097:0.83,10.5;
PF07715.10	Plug	TonB-dependent Receptor Plug Domain	PACid452477:3.1,9.0;
PF10734.4	DUF2523	Protein of unknown function (DUF2523)	PACid451930:0.056,14.5;PACid451902:0.13,13.4;PACid447634:0.18,12.9;PACid472813:9,7.5;
PF12715.2	Abhydrolase_7	Abhydrolase family	PACid488978:0.099,12.4;PACid488959:0.13,12.0;
PF05248.7	Adeno_E3A	Adenovirus E3A	PACid480628:0.0085,17.0;PACid445271:0.29,12.1;PACid481975:5,8.1;
PF14714.1	KH_dom-like	KH-domain-like of EngA bacterial GTPase enzymes, C-terminal	PACid483047:0.16,12.8;
PF09131.5	Endotoxin_mid	Bacillus thuringiensis delta-Endotoxin, middle domain	PACid476669:0.37,11.1;
PF08872.5	KGK	KGK domain	PACid452670:0.12,13.5;
PF14135.1	DUF4302	Domain of unknown function (DUF4302)	PACid474425:0.23,11.7;
PF05865.6	Cypo_polyhedrin	Cypovirus polyhedrin protein	PACid488702:0.34,11.0;
PF08842.5	Mfa2	Fimbrillin-A associated anchor proteins Mfa1 and Mfa2	PACid471007:0.22,11.7;
PF03192.8	DUF257	Pyrococcus protein of unknown function, DUF257	PACid471443:0.23,11.6;PACid466374:1.4,9.0;
PF15577.1	Spc7_C2	Spc7_C2	PACid474207:0.018,15.5;
PF06808.7	DctM	DctM-like transporters	PACid459880:0.25,10.8;
PF14301.1	DUF4376	Domain of unknown function (DUF4376)	PACid482627:0.13,13.3;
PF11730.3	DUF3297	Protein of unknown function (DUF3297)	PACid454041:0.17,12.5;
PF09994.4	DUF2235	Uncharacterized alpha/beta hydrolase domain (DUF2235)	PACid465548:0.24,11.6;
PF08865.6	DUF1830	Domain of unknown function (DUF1830)	PACid471770:0.83,10.2;
PF11625.3	DUF3253	Protein of unknown function (DUF3253)	PACid465725:0.0043,17.8;
PF07339.7	DUF1472	Protein of unknown function (DUF1472)	PACid474014:0.25,12.6;
PF08126.6	Propeptide_C25	Propeptide_C25	PACid450508:0.069,13.0;
PF05128.7	DUF697	Domain of unknown function (DUF697)	PACid490896:9.5,6.6;
PF06815.8	RVT_connect	Reverse transcriptase connection domain	PACid450704:4.3,8.1;
PF06288.8	DUF1040	Protein of unknown function (DUF1040)	PACid465938:0.037,15.1;
PF11489.3	DUF3210	Protein of unknown function (DUF3210)	PACid447239:0.06,12.9;
PF15532.1	Toxin_53	Putative toxin 53	PACid477537:0.089,13.9;
PF01174.14	SNO	SNO glutamine amidotransferase family	PACid447822:0.063,13.8;PACid474617:0.13,12.8;
PF12920.2	TcdA_TcdB_pore	TcdA/TcdB pore forming domain	PACid449912:0.017,14.0;
PF08049.6	IlvB_leader	IlvB leader peptide	PACid456863:0.065,13.9;
PF14334.1	DUF4390	Domain of unknown function (DUF4390)	PACid463723:0.24,11.5;PACid486622:0.35,10.9;
PF06145.6	Corona_NS1	Coronavirus nonstructural protein NS1	PACid453250:0.04,14.1;PACid447356:0.59,10.4;
PF09009.5	Exotox-A_cataly	Exotoxin A catalytic	PACid445275:0.11,12.3;
PF05788.7	Orbi_VP1	Orbivirus RNA-dependent RNA polymerase (VP1)	PACid462594:0.039,12.1;
PF12671.2	Amidase_6	Putative amidase domain	PACid467946:0.39,11.6;
PF07235.6	DUF1427	Protein of unknown function (DUF1427)	PACid455162:0.25,12.3;PACid466545:1,10.3;PACid444574:1.2,10.1;PACid447481:1.7,9.6;PACid459321:4.1,8.4;PACid489334:4.5,8.3;
PF11686.3	DUF3283	Protein of unknown function (DUF3283)	PACid452223:0.44,11.3;
PF13117.1	Cag12	Cag pathogenicity island protein Cag12	PACid443013:0.33,11.7;
PF02265.11	S1-P1_nuclease	S1/P1 Nuclease	PACid471007:0.029,14.9;
PF10726.4	DUF2518	Protein of function (DUF2518)	PACid483707:5.2,7.5;
PF11233.3	DUF3035	Protein of unknown function (DUF3035)	PACid454346:1.6,9.7;
PF11723.3	Aromatic_hydrox	Homotrimeric ring hydroxylase	PACid481426:0.03,14.5;
PF11745.3	DUF3304	Protein of unknown function (DUF3304)	PACid460817:0.25,12.4;
PF15401.1	TAA-Trp-ring	Tryptophan-ring motif of head of Trimeric autotransporter adhesin	PACid460140:0.21,12.7;PACid455844:2.2,9.4;
PF02577.9	DNase-RNase	Bifunctional nuclease	PACid464286:0.1,12.7;
PF09080.5	K-cyclin_vir_C	K cyclin, C terminal	PACid480586:0.031,15.3;
PF04596.7	Pox_F15	Poxvirus protein F15	PACid467078:0.18,12.2;
PF08588.5	DUF1769	Protein of unknown function (DUF1769)	PACid476262:0.29,12.0;
PF02673.13	BacA	Bacitracin resistance protein BacA	PACid450060:0.0021,18.2;
PF02281.11	Dimer_Tnp_Tn5	Transposase Tn5 dimerisation domain	PACid443776:0.27,12.2;
PF10592.4	AIPR	AIPR protein	PACid456170:1.2,9.3;
PF06939.6	DUF1286	Protein of unknown function (DUF1286)	PACid447393:0.17,13.0;
PF06168.6	DUF981	Protein of unknown function (DUF981)	PACid453837:0.16,12.6;PACid465617:0.2,12.3;
PF02417.10	Chromate_transp	Chromate transporter	PACid448008:0.02,15.4;
PF11390.3	FdsD	NADH-dependant formate dehydrogenase delta subunit FdsD	PACid491454:3.8e-19,69.4;
PF12177.3	Proho_convert	Prohormone convertase enzyme	PACid486690:0.25,11.8;
PF09215.5	Phage-Gp8	Bacteriophage T4, Gp8	PACid477445:0.1,12.6;
PF12049.3	DUF3531	Protein of unknown function (DUF3531)	PACid455209:0.05,14.2;
PF09176.6	Mpt_N	Methylene-tetrahydromethanopterin dehydrogenase, N-terminal	PACid445091:0.00033,21.3;
PF05614.6	DUF782	Circovirus protein of unknown function (DUF782)	PACid470954:0.19,12.8;PACid473573:0.63,11.1;
PF05151.7	PsbM	Photosystem II reaction centre M protein (PsbM)	PACid441097:0.65,10.5;
PF12173.3	BacteriocIIc_cy	Bacteriocin class IIc cyclic gassericin A-like	PACid462433:0.12,13.3;PACid484414:3.3,8.7;PACid450700:5.4,8.0;
PF15645.1	Tox-PLDMTX	Dermonecrotoxin of the Papain-like fold	PACid456578:0.15,13.0;
PF07747.6	MTH865	MTH865-like family	PACid484827:0.056,14.0;
PF13116.1	DUF3971	Protein of unknown function	PACid484323:0.0098,16.2;
PF04492.8	Phage_rep_O	Bacteriophage replication protein O	PACid481906:0.0036,18.4;
PF06615.6	DUF1147	Protein of unknown function (DUF1147)	PACid479380:0.1,13.3;PACid455711:0.11,13.2;
PF05268.6	GP38	Phage tail fibre adhesin Gp38	PACid474911:7.1,6.9;
PF11335.3	DUF3137	Protein of unknown function (DUF3137)	PACid488118:9.4,6.8;
PF02962.10	CHMI	5-carboxymethyl-2-hydroxymuconate isomerase	PACid480135:1.1e-05,26.5;
PF11024.3	DGF-1_4	Dispersed gene family protein 1 of Trypanosoma cruzi region 4	PACid485916:0.36,12.1;PACid451294:0.45,11.8;
PF07954.6	DUF1689	Protein of unknown function (DUF1689)	PACid443676:0.014,16.2;
PF14928.1	S_tail_recep_bd	Short tail fibre protein receptor-binding domain	PACid457831:2,9.5;PACid457829:4,8.5;
PF04025.7	DUF370	Domain of unknown function (DUF370)	PACid472495:0.14,13.1;
