# Supplementary material for: A Phylogenomic Framework and Divergence History of Cephalochordata Amphioxus
Source: Front Physiol. 2018 Dec 18;9:1833. doi: 10.3389/fphys.2018.01833 (PMC6305399; doi:10.3389/fphys.2018.01833)
Supplement: TABLE S5 — Information of lineage-specific domains in Branchiostoma lanceolatum. [file Table_5.xlsx]

## Sheet: bla.pfama
Table S5 Information of lineage-specific domains in Branchiostoma lanceolatum.
Pfam id	Pfam name	Pfam description	Align info(alu)
PF02547.10	Queuosine_synth	Queuosine biosynthesis protein	JT877207.1:0.074,13.7;JT861095.1:0.17,12.5;
PF11778.3	SID	Septation initiation	JT900468.1:0.31,12.8;
PF05892.6	Tricho_coat	Trichovirus coat protein	JT854993.1:0.47,11.6;
PF05331.6	DUF742	Protein of unknown function (DUF742)	JT854010.1:0.046,15.2;
PF10702.4	DUF2507	Protein of unknown function (DUF2507)	JT853936.1:0.26,12.9;
PF04240.7	DUF422	Protein of unknown function (DUF422)	JT875116.1:0.03,15.6;
PF11047.3	SopD	Salmonella outer protein D	JT867838.1:0.57,11.0;JT883965.1:0.9,10.4;
PF10022.4	DUF2264	Uncharacterized protein conserved in bacteria (DUF2264)	JT898403.1:0.17,12.4;
PF13016.1	Gliadin	Cys-rich Gliadin N-terminal	JT873176.1:0.15,14.2;
PF07273.7	DUF1439	Protein of unknown function (DUF1439)	JT877799.1:0.11,14.1;
PF02282.11	Herpes_UL42	DNA polymerase processivity factor (UL42)	JT890855.1:0.16,13.5;
PF02497.10	Arteri_GP4	Arterivirus glycoprotein	JT874662.1:0.031,16.1;
PF00998.18	RdRP_3	Viral RNA dependent RNA polymerase	JT896075.1:0.018,15.5;JT898924.1:0.19,12.2;
PF06389.6	Filo_VP24	Filovirus membrane-associated protein VP24	JT904362.1:0.0057,17.8;
PF00964.12	Elicitin	Elicitin	JT886695.1:0.0057,18.5;JT862731.1:0.39,12.6;
PF07487.8	SopE_GEF	SopE GEF domain	JT881256.1:0.0076,18.1;
PF12276.3	DUF3617	Protein of unknown function (DUF3617)	JT864466.1:0.25,12.7;
PF11777.3	DUF3316	Protein of unknown function (DUF3316)	JT885687.1:0.34,12.6;JT855254.1:0.45,12.2;
PF10992.3	DUF2816	Protein of unknown function (DUF2816)	JT893434.1:0.024,16.1;JT877603.1:0.078,14.5;
PF09056.6	Phospholip_A2_3	Prokaryotic phospholipase A2	JT896291.1:0.15,14.2;
PF04984.9	Phage_sheath_1	Phage tail sheath protein	JT864580.1:0.53,10.6;
PF08977.5	BOFC_N	Bypass of Forespore C, N terminal	JT897021.1:0.78,11.5;
PF09554.5	RE_HaeII	HaeII restriction endonuclease	JT860478.1:0.44,11.4;
PF11456.3	DUF3019	Protein of unknown function (DUF3019)	JT887349.1:0.3,13.3;
PF07141.6	Phage_term_sma	Putative bacteriophage terminase small subunit	JT880116.1:0.48,11.9;
PF09147.5	DUF1933	Domain of unknown function (DUF1933)	JT872852.1:0.34,12.2;
PF04885.8	Stig1	Stigma-specific protein, Stig1	JT872958.1:0.08,15.1;
PF08180.6	BAGE	B melanoma antigen family	JT903260.1:0.69,11.6;
PF12585.3	DUF3759	Protein of unknown function (DUF3759)	JT876664.1:0.091,14.6;JT863600.1:0.45,12.3;
PF00747.12	Viral_DNA_bp	ssDNA binding protein	JT852813.1:0.63,9.1;JT873148.1:0.91,8.6;
PF12087.3	DUF3564	Protein of unknown function (DUF3564)	JT894416.1:0.6,11.6;
PF12016.3	Stonin2_N	Stonin 2	JT905566.1:0.37,11.8;
PF07853.6	DUF1648	Protein of unknown function (DUF1648)	JT872185.1:0.63,11.5;
PF06691.6	DUF1189	Protein of unknown function (DUF1189)	JT856371.1:0.049,14.9;JT878293.1:0.51,11.5;
PF01098.14	FTSW_RODA_SPOVE	Cell cycle protein	JT849570.1:0.14,12.8;
PF03211.8	Pectate_lyase	Pectate lyase	JT849080.1:1.5,10.1;
PF09820.4	AAA-ATPase_like	Predicted AAA-ATPase	JT865652.1:0.081,14.0;
PF14423.1	Imm5	Immunity protein Imm5	JT851280.1:9.4,7.7;
PF14416.1	PMR5N	PMR5 N terminal Domain	JT894702.1:0.15,14.1;JT876586.1:0.55,12.2;JT855415.1:0.97,11.4;
PF10974.3	DUF2804	Protein of unknown function (DUF2804)	JT872986.1:0.1,13.4;JT847085.1:0.71,10.6;
PF04017.7	DUF366	Domain of unknown function (DUF366)	JT852575.1:0.58,11.3;
PF04284.8	DUF441	Protein of unknown function (DUF441)	JT869456.1:0.15,13.9;
PF07166.6	DUF1398	Protein of unknown function (DUF1398)	JT884917.1:0.31,12.8;JT865930.1:0.55,12.0;
PF05452.6	Clavanin	Clavanin	JT881436.1:0.47,12.3;
PF05503.7	Pox_G7	Poxvirus G7-like	JT897036.1:0.95,9.9;JT896628.1:1.7,9.1;
PF12133.3	Sars6	Open reading frame 6 from SARS coronavirus	JT888152.1:0.08,14.5;
PF06899.6	WzyE	WzyE protein	JT864483.1:0.4,11.3;
PF07922.6	Glyco_transf_52	Glycosyltransferase family 52	JT884668.1:0.23,12.4;
PF06790.6	UPF0259	Uncharacterised protein family (UPF0259)	JT905237.1:0.0041,18.5;
PF07682.6	SOR	Sulphur oxygenase reductase	JT883078.1:0.43,11.0;
PF01976.12	DUF116	Protein of unknown function DUF116	JT902353.1:0.0039,18.6;JT869672.1:0.078,14.4;JT887722.1:4,8.8;
PF10667.4	DUF2486	Protein of unknown function (DUF2486)	JT860308.1:3.2,10.2;
PF06797.6	DUF1229	Protein of unknown function (DUF1229)	JT872198.1:0.044,14.6;
PF07514.6	TraI_2	Putative helicase	JT861095.1:0.3,11.7;
PF06999.7	Suc_Fer-like	Sucrase/ferredoxin-like	JT867798.1:0.29,13.1;
PF05513.6	TraA	TraA	JT847565.1:0.37,12.9;
PF09225.5	Endonuc-PvuII	Restriction endonuclease PvuII	JT899015.1:0.58,11.7;
PF11161.3	DUF2944	Protein of unknown function (DUF2946)	JT892743.1:0.092,14.3;
PF10533.4	Plant_zn_clust	Plant zinc cluster domain	JT888941.1:2.5,9.7;JT864214.1:9.1,7.9;
PF02445.11	NadA	Quinolinate synthetase A protein	JT861148.1:0.025,15.3;JT886029.1:0.16,12.6;
PF10983.3	DUF2793	Protein of unknown function (DUF2793)	JT864006.1:0.68,11.7;
PF10818.3	DUF2547	Protein of unknown function (DUF2547)	JT847100.1:0.37,13.3;
PF11004.3	Kdo_hydroxy	3-deoxy-D-manno-oct-2-ulosonic acid (Kdo) hydroxylase	JT853813.1:0.79,10.6;
PF04724.8	Glyco_transf_17	Glycosyltransferase family 17	JT857334.1:0.052,14.5;JT897634.1:0.27,12.1;
PF14650.1	FAM75	FAM75 family	JT862167.1:0.15,13.4;JT866001.1:2.8,9.2;
PF12935.2	Sec16_N	Vesicle coat trafficking protein Sec16 N-terminus	JT846583.1:0.0017,20.2;
PF10688.4	Imp-YgjV	Bacterial inner membrane protein	JT874715.1:0.04,15.3;JT862793.1:0.053,14.9;JT868026.1:0.37,12.1;
PF14467.1	DUF4426	Domain of unknown function (DUF4426)	JT872811.1:0.023,16.4;
PF03139.10	AnfG_VnfG	Vanadium/alternative nitrogenase delta subunit	JT886760.1:0.36,12.5;
PF12311.3	DUF3632	Protein of unknown function (DUF3632)	JT859772.1:0.31,12.8;
PF11060.3	DUF2861	Protein of unknown function (DUF2861)	JT846981.1:0.19,13.0;
PF09276.5	Pertus-S5-tox	Pertussis toxin S5 subunit	JT847489.1:0.54,12.1;
PF14944.1	TCRP1	Tongue Cancer Chemotherapy Resistant Protein 1	JT857727.1:0.12,14.2;JT903071.1:0.16,13.8;JT892491.1:0.38,12.6;
PF09287.5	CEP1-DNA_bind	CEP-1, DNA binding	JT859515.1:0.45,11.8;
PF01840.12	TCL1_MTCP1	TCL1/MTCP1 family	JT851678.1:0.44,11.9;
PF09265.5	Cytokin-bind	Cytokinin dehydrogenase 1, FAD and cytokinin binding	JT892920.1:7,7.6;
PF04937.10	DUF659	Protein of unknown function (DUF 659)	JT888029.1:0.091,14.2;JT904161.1:0.15,13.5;JT889357.1:1.6,10.1;
PF15258.1	FAM222A	Protein family of FAM222A	JT894951.1:0.41,11.7;JT895255.1:1,10.4;
PF10967.3	DUF2769	Protein of unknown function (DUF2769)	JT876289.1:0.072,15.3;JT892721.1:7.4,8.8;
PF04732.9	Filament_head	Intermediate filament head (DNA binding) region	JT870859.1:0.57,12.8;
PF07032.6	DUF1322	Protein of unknown function (DUF1322)	JT889207.1:0.00036,22.6;
PF07215.6	DUF1419	Protein of unknown function (DUF1419)	JT901932.1:0.21,13.4;
PF08761.6	dUTPase_2	dUTPase	JT865767.1:0.33,12.9;
PF10711.4	DUF2513	Hypothetical protein (DUF2513)	JT885299.1:0.59,12.1;
PF07026.6	DUF1317	Protein of unknown function (DUF1317)	JT867373.1:0.27,13.0;
PF03503.8	Chlam_OMP3	Chlamydia cysteine-rich outer membrane protein 3	JT887547.1:0.28,13.3;
PF09148.5	DUF1934	Domain of unknown function (DUF1934)	JT858658.1:0.31,12.7;
PF02329.11	HDC	Histidine carboxylase PI chain	JT861115.1:0.29,11.7;
PF08987.5	DUF1892	Protein of unknown function (DUF1892)	JT879469.1:0.033,16.1;
PF11402.3	Antifungal_prot	Antifungal protein	JT896287.1:0.053,15.6;JT863071.1:0.15,14.1;
PF04700.7	Baculo_gp41	Structural glycoprotein p40/gp41 conserved region	JT895003.1:0.48,11.7;
PF11859.3	DUF3379	Protein of unknown function (DUF3379)	JT872747.1:0.29,12.2;
PF08035.6	Op_neuropeptide	Opioids neuropeptide	JT877884.1:0.3,12.6;JT859765.1:0.72,11.4;JT868357.1:2.6,9.6;
PF05136.8	Phage_portal_2	Phage portal protein, lambda family	JT893868.1:0.16,12.4;JT881057.1:0.22,12.0;
PF10061.4	DUF2299	Uncharacterized conserved protein (DUF2299)	JT853755.1:0.22,12.9;
PF13114.1	RecO_N_2	RecO N terminal	JT881439.1:0.016,16.8;
PF09648.5	YycI	YycH protein	JT851936.1:0.41,12.0;
PF07046.6	CRA_rpt	Cytoplasmic repetitive antigen (CRA) like repeat	JT893604.1:3.4,9.6;
PF07291.6	MauE	Methylamine utilisation protein MauE	JT858752.1:0.15,13.6;JT857569.1:0.58,11.7;
PF14673.1	DUF4459	Domain of unknown function (DUF4459)	JT853958.1:0.68,11.5;
PF12222.3	PNGaseA	Peptide N-acetyl-beta-D-glucosaminyl asparaginase amidase A	JT876329.1:0.21,12.4;
PF14142.1	YrzO	YrzO-like protein	JT898352.1:0.64,11.6;
PF06622.6	SepQ	SepQ protein	JT859166.1:0.19,12.5;
PF03335.8	Phage_fiber	Phage tail fibre repeat	JT887395.1:0.096,14.2;
PF04948.8	Pox_A51	Poxvirus A51 protein	JT873005.1:2.3,8.7;
PF00825.13	Ribonuclease_P	Ribonuclease P	JT864532.1:0.26,13.1;
PF15155.1	MRFAP1	MORF4 family-associated protein1	JT885597.1:0.25,13.6;
PF13929.1	mRNA_stabil	mRNA stabilisation	JT853462.1:0.38,11.6;
PF03829.8	PTSIIA_gutA	PTS system glucitol/sorbitol-specific IIA component	JT888892.1:0.26,12.9;
PF14717.1	DUF4465	Domain of unknown function (DUF4465)	JT905636.1:0.16,14.3;
PF14510.1	ABC_trans_N	ABC-transporter extracellular N-terminal	JT881745.1:0.37,12.8;
PF11763.3	DIPSY	Cell-wall adhesin ligand-binding C-terminal	JT858349.1:0.047,15.4;JT849878.1:0.38,12.4;JT904157.1:0.48,12.1;JT866743.1:0.61,11.8;
PF12143.3	PPO1_KFDV	Protein of unknown function (DUF_B2219)	JT850082.1:0.28,13.0;
PF06942.7	GlpM	GlpM protein	JT847331.1:0.0079,18.3;JT896715.1:0.52,12.5;
PF02818.10	PPAK	PPAK motif	JT876629.1:0.069,14.9;
PF15060.1	PPDFL	Differentiation and proliferation regulator	JT902927.1:0.029,16.3;JT883719.1:4.8,9.1;
PF10330.4	Stb3	Putative Sin3 binding protein	JT864043.1:0.91,11.1;
PF13611.1	Peptidase_S76	Serine peptidase of plant viral polyprotein, P1	JT864471.1:0.17,13.9;
PF02916.10	DNA_PPF	DNA polymerase processivity factor	JT898323.1:0.24,13.4;
PF04850.7	Baculo_E66	Baculovirus E66 occlusion-derived virus envelope protein	JT886029.1:0.21,12.5;
PF08591.5	RNR_inhib	Ribonucleotide reductase inhibitor	JT857257.1:0.49,13.2;
PF02999.9	Borrelia_orfD	Borrelia orf-D family	JT878863.1:0.15,14.0;
PF08476.5	VD10_N	Viral D10 N-terminal	JT883351.1:0.23,12.8;JT903484.1:0.4,12.1;
PF14062.1	DUF4253	Domain of unknown function (DUF4253)	JT895463.1:0.36,12.4;JT862658.1:0.38,12.3;JT879516.1:0.56,11.8;
PF02790.10	COX2_TM	Cytochrome C oxidase subunit II, transmembrane domain	JT892489.1:0.34,12.8;JT894672.1:0.39,12.6;JT891665.1:2.2,10.2;
PF12226.3	Astro_capsid_p	Turkey astrovirus capsid protein	JT893579.1:0.25,12.5;JT895814.1:0.37,11.9;JT886546.1:0.47,11.6;
PF00516.13	GP120	Envelope glycoprotein GP120	JT851570.1:0.084,13.0;
PF05567.6	Neisseria_PilC	Neisseria PilC beta-propeller domain	JT879862.1:0.36,11.8;
PF03596.8	Cad	Cadmium resistance transporter	JT871407.1:0.033,15.8;
PF06055.7	ExoD	Exopolysaccharide synthesis, ExoD	JT903670.1:0.077,14.0;JT903908.1:0.17,12.9;JT851699.1:0.35,11.9;JT865990.1:0.72,10.8;
PF02133.10	Transp_cyt_pur	Permease for cytosine/purines, uracil, thiamine, allantoin	JT849535.1:0.28,11.6;JT850606.1:0.47,10.9;
PF12734.2	CYSTM	Cysteine-rich TM module stress tolerance	JT869470.1:0.013,17.4;JT885591.1:0.59,12.1;
PF03400.8	DDE_Tnp_IS1	IS1 transposase	JT866641.1:0.11,14.6;
PF13732.1	DUF4162	Domain of unknown function (DUF4162)	JT885432.1:0.4,13.1;
PF14819.1	QueF_N	Nitrile reductase, 7-cyano-7-deazaguanine-reductase N-term	JT898073.1:0.037,16.0;
PF09667.5	DUF2028	Domain of unknown function (DUF2028)	JT871534.1:0.39,12.7;
PF11046.3	HycA_repressor	Transcriptional repressor of hyc and hyp operons	JT872651.1:0.55,12.1;
PF14104.1	DUF4277	Domain of unknown function (DUF4277)	JT860410.1:0.66,12.1;
PF12821.2	DUF3815	Protein of unknown function (DUF3815)	JT867167.1:0.017,17.0;JT848975.1:0.058,15.2;JT873530.1:0.34,12.7;
PF01677.11	Herpes_UL7	Herpesvirus UL7 like	JT855160.1:0.089,14.0;JT864127.1:0.13,13.6;
PF04217.8	DUF412	Protein of unknown function, DUF412	JT902436.1:0.42,12.3;
PF04282.8	DUF438	Family of unknown function (DUF438)	JT851433.1:0.36,12.5;
PF15347.1	PAG	Phosphoprotein associated with glycosphingolipid-enriched	JT875050.1:0.027,15.5;
PF03526.8	Microcin	Colicin E1 (microcin) immunity protein	JT854057.1:0.97,11.0;
PF12113.3	SVM_signal	SVM protein signal sequence	JT882027.1:0.11,14.3;JT896663.1:0.23,13.2;JT904149.1:0.31,12.8;
PF04319.8	NifZ	NifZ domain	JT885802.1:0.78,11.0;
PF10315.4	DUF2416	Protein of unknown function (DUF2416)	JT846397.1:0.39,12.9;JT896784.1:0.44,12.7;
PF02107.11	FlgH	Flagellar L-ring protein	JT885452.1:0.29,12.6;
PF09559.5	Cas6	Cas6 Crispr	JT892420.1:0.54,11.9;
PF12439.3	GDE_N	Glycogen debranching enzyme N terminal	JT847312.1:0.13,13.4;JT879991.1:0.37,11.9;
PF02979.11	NHase_alpha	Nitrile hydratase, alpha chain	JT847738.1:0.62,11.2;JT856546.1:5.4,8.2;
PF04776.7	DUF626	Protein of unknown function (DUF626)	JT863648.1:0.2,13.9;
PF04813.7	HNF-1A_C	Hepatocyte nuclear factor 1 (HNF-1), alpha isoform C terminus	JT879918.1:0.0087,18.2;
PF00446.12	GnRH	Gonadotropin-releasing hormone	JT904780.1:0.71,11.8;
PF10063.4	DUF2301	Uncharacterized integral membrane protein (DUF2301)	JT895698.1:0.28,13.3;JT863105.1:2.2,10.4;
PF07305.7	DUF1454	Protein of unknown function (DUF1454)	JT880699.1:0.2,12.7;JT853669.1:0.41,11.6;
PF12487.3	DUF3703	Protein of unknown function (DUF3703)	JT863088.1:0.24,13.0;JT886494.1:0.42,12.2;
PF12058.3	DUF3539	Protein of unknown function (DUF3539)	JT898761.1:0.14,13.9;JT876664.1:7.4,8.4;
PF14064.1	HmuY	HmuY protein	JT864187.1:0.25,13.2;
PF02489.11	Herpes_glycop_H	Herpesvirus glycoprotein H	JT903462.1:0.12,12.3;
PF05289.6	BLYB	Borrelia hemolysin accessory protein	JT876290.1:1.3,10.7;
PF06460.7	NSP13	Coronavirus NSP13	JT900554.1:0.057,14.2;
PF06643.6	DUF1158	Protein of unknown function (DUF1158)	JT873490.1:0.21,13.8;JT880527.1:0.53,12.5;JT888904.1:0.76,12.0;
PF14027.1	DUF4243	Protein of unknown function (DUF4243)	JT901906.1:0.46,11.8;
PF11564.3	BpuJI_N	Restriction endonuclease BpuJI - N terminal	JT851381.1:0.036,15.0;
PF04483.7	DUF565	Protein of unknown function (DUF565)	JT867555.1:0.19,13.8;
PF15122.1	TMEM206	TMEM206 protein family	JT879373.1:0.18,12.6;
PF02175.11	7TM_GPCR_Srb	Serpentine type 7TM GPCR chemoreceptor Srb	JT904202.1:0.22,13.0;
PF05244.6	Brucella_OMP2	Brucella outer membrane protein 2	JT858892.1:0.59,11.2;
PF04555.8	XhoI	Restriction endonuclease XhoI	JT866702.1:0.85,10.9;
PF06567.6	Neural_ProG_Cyt	Neural chondroitin sulphate proteoglycan cytoplasmic domain	JT898510.1:0.24,13.4;JT861006.1:0.39,12.8;
PF06360.6	E_raikovi_mat	Euplotes raikovi mating pheromone	JT855665.1:0.082,15.0;JT875200.1:0.19,13.8;JT864672.1:0.26,13.4;JT898387.1:0.28,13.3;JT850783.1:0.59,12.3;
PF09097.5	Phage-tail_1	Baseplate structural protein, domain 1	JT893874.1:0.12,13.8;JT852883.1:0.18,13.2;
PF01481.11	Arteri_nucleo	Arterivirus nucleocapsid protein	JT897000.1:0.07,15.1;
PF08437.5	Glyco_transf_8C	Glycosyl transferase family 8 C-terminal	JT857774.1:0.062,15.2;JT860146.1:1.2,11.1;
PF07029.6	CryBP1	CryBP1 protein	JT885337.1:0.16,13.6;
PF08942.5	DUF1919	Domain of unknown function (DUF1919)	JT873067.1:0.25,12.6;
PF01646.11	Herpes_UL24	Herpes virus protein UL24	JT849746.1:0.014,16.8;
PF04412.8	DUF521	Protein of unknown function (DUF521)	JT870316.1:0.11,13.0;
PF06404.7	PSK	Phytosulfokine precursor protein (PSK)	JT851881.1:0.26,14.0;
PF11912.3	DUF3430	Protein of unknown function (DUF3430)	JT895611.1:0.049,15.4;
PF07389.7	DUF1500	Protein of unknown function (DUF1500)	JT899606.1:0.089,14.7;JT895191.1:0.099,14.6;
PF09856.4	DUF2083	Predicted transcriptional regulator (DUF2083)	JT865450.1:0.34,12.5;
PF06929.6	Rotavirus_VP3	Rotavirus VP3 protein	JT890728.1:0.23,11.3;
PF02622.10	DUF179	Uncharacterized ACR, COG1678	JT892492.1:0.37,12.3;
PF12801.2	Fer4_5	4Fe-4S binding domain	JT886057.1:0.11,14.1;
PF07625.6	DUF1586	Protein of unknown function (DUF1586)	JT851678.1:0.039,15.6;JT869163.1:0.27,12.9;
PF07124.6	Phytoreo_P8	Phytoreovirus outer capsid protein P8	JT862770.1:0.33,11.5;
PF04294.8	VanW	VanW like protein	JT874140.1:0.22,12.6;
PF06634.7	DUF1156	Protein of unknown function (DUF1156)	JT905220.1:0.32,12.7;
PF11435.3	She2p	RNA binding protein She2p	JT862817.1:0.027,15.8;
PF13958.1	ToxN_toxin	Toxin ToxN, type III toxin-antitoxin system	JT898295.1:0.092,14.3;JT854623.1:1.1,10.8;
PF07154.6	DUF1392	Protein of unknown function (DUF1392)	JT892123.1:0.35,12.6;
PF05488.8	PAAR_motif	PAAR motif	JT902360.1:0.4,12.6;
PF13502.1	AsmA_2	AsmA-like C-terminal region	JT892671.1:0.65,11.2;
PF11124.3	Pho86	Inorganic phosphate transporter Pho86	JT883090.1:0.44,11.4;JT856404.1:3.9,8.3;
PF10182.4	Flo11	Flo11 domain	JT904221.1:1.1,10.7;
PF08297.6	U3_snoRNA_assoc	U3 snoRNA associated	JT859142.1:0.18,14.0;
PF13055.1	DUF3917	Protein of unknown function (DUF3917)	JT866595.1:0.16,14.1;
PF11017.3	DUF2855	Protein of unknown function (DUF2855)	JT856543.1:0.073,14.1;
PF02705.11	K_trans	K+ potassium transporter	JT857442.1:0.031,14.6;JT891483.1:0.57,10.4;
PF12011.3	DUF3503	Domain of unknown function (DUF3503)	JT875240.1:5.1,8.7;
PF11953.3	DUF3470	Domain of unknown function (DUF3470)	JT854054.1:0.46,12.0;
PF02028.12	BCCT	BCCT family transporter	JT866456.1:0.52,10.4;JT874001.1:5,7.2;
PF02061.11	Lambda_CIII	Lambda Phage CIII	JT848863.1:0.64,11.9;
PF08859.6	DGC	DGC domain	JT879596.1:0.3,12.9;
PF06863.7	DUF1254	Protein of unknown function (DUF1254)	JT871555.1:0.43,12.3;
PF12206.3	DUF3599	Domain of unknown function (DUF3599)	JT876647.1:4.1e-05,25.7;
PF09129.6	Chol_subst-bind	Cholesterol oxidase, substrate-binding	JT870954.1:0.34,11.9;
PF13341.1	RAG2_PHD	RAG2 PHD domain	JT901829.1:0.077,14.9;
PF11032.3	ApoM	Apolipoprotein M (ApoM)	JT903968.1:0.012,17.1;
PF03418.9	Peptidase_A25	Germination protease	JT899985.1:0.27,11.8;
PF05689.6	DUF823	Salmonella repeat of unknown function (DUF823)	JT855873.1:0.009,17.3;
PF14249.1	Tocopherol_cycl	Tocopherol cyclase	JT892621.1:0.37,11.4;
PF15650.1	Tox-REase-9	Restriction endonuclease fold toxin 9	JT856354.1:0.077,15.1;
PF03838.9	RecU	Recombination protein U	JT872616.1:0.069,14.6;JT888581.1:0.075,14.5;
PF04365.8	DUF497	Protein of unknown function (DUF497)	JT863863.1:0.42,12.4;
PF03916.9	NrfD	Polysulphide reductase, NrfD	JT889168.1:0.57,11.5;
PF02401.13	LYTB	LytB protein	JT847909.1:0.16,12.8;
PF14730.1	DUF4468	Domain of unknown function (DUF4468) with TBP-like fold	JT890318.1:0.039,15.5;
PF10086.4	DUF2324	Putative membrane peptidase family (DUF2324)	JT894185.1:0.26,12.4;
PF15596.1	Imm34	Immunity protein 34	JT898464.1:0.24,13.5;
PF04001.8	Vhr1	Transcription factor Vhr1	JT883333.1:0.32,12.8;
PF15090.1	DUF4553	Domain of unknown function (DUF4553)	JT897337.1:1.7,9.5;
PF08188.6	Protamine_3	Spermatozal protamine family	JT902184.1:0.076,14.9;JT857964.1:0.5,12.3;
PF02091.10	tRNA-synt_2e	Glycyl-tRNA synthetase alpha subunit	JT879149.1:0.98,10.4;
PF14216.1	DUF4326	Domain of unknown function (DUF4326)	JT897545.1:3,10.4;
PF06181.6	DUF989	Protein of unknown function (DUF989)	JT885488.1:0.0057,17.7;JT902291.1:0.14,13.2;
PF10852.3	DUF2651	Protein of unknown function (DUF2651)	JT861642.1:0.42,12.9;JT859359.1:0.51,12.6;JT877759.1:0.76,12.1;JT860448.1:3.2,10.1;
PF05999.6	Herpes_U5	Herpesvirus U5-like family	JT897452.1:0.019,15.6;
PF14307.1	Glyco_tran_WbsX	Glycosyltransferase WbsX	JT853429.1:0.53,11.3;
PF07939.6	DUF1685	Protein of unknown function (DUF1685)	JT851241.1:0.23,13.0;
PF00074.15	RnaseA	Pancreatic ribonuclease	JT894126.1:0.13,14.4;
PF09709.5	Cas_Csd1	CRISPR-associated protein (Cas_Csd1)	JT852073.1:0.22,11.7;
PF14426.1	Imm2	Immunity protein Imm2	JT886104.1:0.33,12.9;
PF14404.1	Strep_pep	Ribosomally synthesized peptide in Streptomyces species	JT887691.1:0.09,14.9;
PF13106.1	DUF3961	Domain of unknown function (DUF3961)	JT897899.1:0.28,12.7;
PF15089.1	DUF4552	Domain of unknown function (DUF4552)	JT866292.1:0.44,11.3;
PF07675.6	Cleaved_Adhesin	Cleaved Adhesin Domain	JT886570.1:0.32,12.5;
PF03324.9	Herpes_HEPA	Herpesvirus DNA helicase/primase complex associated protein	JT898306.1:0.0061,18.4;
PF12077.3	DUF3556	Transmembrane protein of unknown function (DUF3556)	JT898024.1:0.45,10.4;
PF15435.1	UNC119_bdg	UNC119-binding protein C5orf30 homologue	JT897942.1:0.24,12.6;
PF02327.12	BChl_A	Bacteriochlorophyll A protein	JT890707.1:0.5,10.9;
PF12344.3	UvrB	Ultra-violet resistance protein B	JT882889.1:1.7,10.1;
PF15655.1	Imm-NTF2	NTF2 fold immunity protein	JT878363.1:0.076,15.4;
PF02813.9	Retro_M	Retroviral M domain	JT873121.1:0.035,16.1;JT864297.1:0.35,12.9;
PF05358.6	DicB	DicB protein	JT889624.1:0.23,12.9;
PF04580.8	Pox_D3	Chordopoxvirinae D3 protein	JT874651.1:0.48,11.5;
PF13693.1	HTH_35	Winged helix-turn-helix DNA-binding	JT900917.1:0.57,11.9;
PF11675.3	DUF3271	Protein of unknown function (DUF3271)	JT895847.1:0.019,16.0;
PF08901.6	DUF1847	Protein of unknown function (DUF1847)	JT900488.1:0.19,13.1;JT862484.1:0.28,12.6;
PF07981.6	Plasmod_MYXSPDY	Plasmodium repeat_MYXSPDY	JT887323.1:0.23,13.1;
PF01639.12	v110	Viral family 110	JT905050.1:0.81,11.2;
PF07530.6	PRE_C2HC	Associated with zinc fingers	JT895688.1:0.21,13.4;
PF13126.1	DUF3975	Protein of unknown function (DUF3975)	JT852000.1:0.14,14.2;
PF01621.12	Fusion_gly_K	Cell fusion glycoprotein K	JT890507.1:0.21,12.5;
PF11843.3	DUF3363	Protein of unknown function (DUF3363)	JT854124.1:0.59,10.6;
PF01697.22	Glyco_transf_92	Glycosyltransferase family 92	JT857949.1:0.088,14.0;
PF04940.7	BLUF	Sensors of blue-light using FAD	JT853325.1:0.55,11.9;
PF09223.6	YodA	YodA lipocalin-like domain	JT862874.1:0.092,14.3;
PF11266.3	DUF3066	Protein of unknown function (DUF3066)	JT861400.1:0.42,12.2;
PF07209.7	DUF1415	Protein of unknown function (DUF1415)	JT895620.1:0.21,13.2;
PF12485.3	SLY	Lymphocyte signaling adaptor protein	JT886390.1:0.046,15.9;
PF11973.3	NQRA_SLBB	NQRA C-terminal domain	JT873113.1:0.82,11.9;
PF06967.6	Mo-nitro_C	Mo-dependent nitrogenase C-terminus	JT889176.1:0.18,13.9;
PF15514.1	ThaI	Restriction endonuclease ThaI	JT865160.1:0.27,12.4;
PF08408.5	DNA_pol_B_3	DNA polymerase family B viral insert	JT880214.1:0.28,13.0;JT895922.1:1.3,10.8;
PF12064.3	DUF3544	Domain of unknown function (DUF3544)	JT886523.1:0.024,16.4;
PF14472.1	DUF4429	Domain of unknown function (DUF4429)	JT862114.1:0.07,15.3;JT846218.1:0.1,14.8;JT883083.1:0.22,13.7;
PF08108.6	Antimicrobial13	Halocidin family	JT870158.1:0.25,13.1;
PF07563.6	DUF1541	Protein of unknown function (DUF1541)	JT862579.1:0.18,13.4;
PF00510.13	COX3	Cytochrome c oxidase subunit III	JT855488.1:2.8e-64,219.0;JT866614.1:0.068,14.5;
PF09427.5	DUF2014	Domain of unknown function (DUF2014)	JT894734.1:0.063,14.3;JT853302.1:0.29,12.2;
PF07762.9	DUF1618	Protein of unknown function (DUF1618)	JT890334.1:0.075,15.1;
PF04583.7	Baculo_p74	Baculoviridae p74 conserved region	JT877487.1:0.23,12.5;JT860897.1:0.66,11.1;
PF03053.9	Corona_NS3b	ORF3b coronavirus protein	JT901386.1:0.091,14.2;JT861917.1:0.12,13.8;JT878374.1:0.31,12.5;JT864626.1:0.36,12.2;JT860789.1:0.68,11.4;JT897680.1:1.8,10.0;JT872036.1:6,8.3;
PF05857.6	TraX	TraX protein	JT859765.1:0.14,13.7;
PF11146.3	DUF2905	Protein of unknown function (DUF2905)	JT870659.1:0.15,13.9;
PF06841.7	Phage_T4_gp19	T4-like virus tail tube protein gp19	JT891599.1:0.035,15.7;JT877152.1:0.19,13.3;
PF04441.8	Pox_VERT_large	Poxvirus early transcription factor (VETF), large subunit	JT870403.1:0.017,15.2;
PF00869.15	Flavi_glycoprot	Flavivirus glycoprotein, central and dimerisation domains	JT899915.1:0.055,14.4;
PF06666.6	DUF1173	Protein of unknown function (DUF1173)	JT898420.1:2.6,8.7;
PF03788.9	LrgA	LrgA family	JT904099.1:0.39,12.3;
PF11756.3	YgbA_NO	Nitrous oxide-stimulated promoter	JT873698.1:0.68,11.9;
PF05407.7	Peptidase_C27	Rubella virus endopeptidase	JT900871.1:1.7,10.2;
PF12546.3	Cryptochrome_C	Blue/Ultraviolet sensing protein C terminal	JT871851.1:0.48,13.0;
PF01136.14	Peptidase_U32	Peptidase family U32	JT889469.1:0.15,12.9;JT865714.1:0.53,11.1;JT874285.1:0.61,10.9;JT899904.1:3,8.6;
PF06186.6	DUF992	Protein of unknown function (DUF992)	JT889211.1:0.14,13.4;
PF04623.7	Adeno_E1B_55K_N	Adenovirus E1B protein N-terminus	JT897613.1:7.9,8.9;
PF11136.3	DUF2889	Protein of unknown function (DUF2889)	JT890943.1:0.32,13.1;
PF09356.5	Phage_BR0599	Phage conserved hypothetical protein BR0599	JT846240.1:0.091,14.8;
PF06182.6	ABC2_membrane_6	ABC-2 family transporter protein	JT895293.1:0.031,15.7;JT860756.1:0.18,13.3;JT898319.1:0.39,12.1;
PF15318.1	Bclt	Putative Bcl-2 like protein of testis	JT867225.1:0.4,12.6;
PF07982.7	Herpes_UL74	Herpes UL74 glycoproteins	JT905427.1:0.045,14.4;
PF06590.6	PerB	PerB protein	JT882456.1:0.072,15.3;
PF11376.3	DUF3179	Protein of unknown function (DUF3179)	JT893163.1:0.068,14.3;JT858562.1:0.11,13.5;
PF15652.1	Tox-SHH	HNH/Endo VII superfamily toxin with a SHH signature	JT851290.1:0.2,14.1;
PF09692.5	Arb1	Argonaute siRNA chaperone (ARC) complex subunit Arb1	JT856559.1:0.39,11.4;JT877345.1:0.55,11.0;
PF06440.6	DNA_pol3_theta	DNA polymerase III, theta subunit	JT869675.1:0.19,13.2;
PF06150.7	ChaB	ChaB	JT861272.1:0.044,15.5;
PF07448.6	Spp-24	Secreted phosphoprotein 24 (Spp-24)	JT863572.1:0.37,12.7;JT904460.1:0.42,12.5;
PF11055.3	Gsf2	Glucose signalling factor 2	JT898364.1:3.4,8.0;
PF10069.4	DICT	Sensory domain found in DIguanylate Cyclases & Two-component systems	JT873662.1:0.42,12.1;
PF09578.5	Spore_YabQ	Spore cortex protein YabQ (Spore_YabQ)	JT877360.1:1.8,10.4;
PF11606.3	AlcCBM31	Family 31 carbohydrate binding protein	JT855105.1:2.7,9.9;
PF14587.1	Glyco_hydr_30_2	O-Glycosyl hydrolase family 30	JT890087.1:0.58,11.0;
PF07391.6	NPR	NPR nonapeptide repeat (2 copies)	JT880761.1:4,9.8;
PF11539.3	DUF3228	Protein of unknown function (DUF3228)	JT864352.1:0.27,12.2;JT877440.1:1,10.4;
PF05661.7	DUF808	Protein of unknown function (DUF808)	JT891460.1:0.51,11.0;
PF05059.7	Orbi_VP4	Orbivirus VP4 core protein	JT886256.1:0.57,9.8;
PF15639.1	Tox-MPTase3	Metallopeptidase toxin 3	JT870721.1:0.31,12.7;
PF11676.3	DUF3272	Protein of unknown function (DUF3272)	JT891363.1:0.14,14.1;
PF05953.7	Allatostatin	Allatostatin	JT875035.1:0.79,12.2;
PF14183.1	YwpF	YwpF-like protein	JT851803.1:0.041,15.5;
PF06178.8	KdgM	Oligogalacturonate-specific porin protein (KdgM)	JT887296.1:0.47,11.9;
PF08353.5	DUF1727	Domain of unknown function (DUF1727)	JT888753.1:0.2,13.2;JT854159.1:0.24,12.9;
PF02247.11	Como_LCP	Large coat protein	JT861206.1:0.098,13.0;JT865553.1:0.53,10.5;JT895558.1:1.3,9.3;
PF04439.7	Adenyl_transf	Streptomycin adenylyltransferase	JT869207.1:0.22,12.4;
PF08533.5	Glyco_hydro_42C	Beta-galactosidase C-terminal domain	JT902809.1:0.49,11.8;
PF01793.11	Glyco_transf_15	Glycolipid 2-alpha-mannosyltransferase	JT851609.1:0.064,14.1;
PF09482.5	OrgA_MxiK	Bacterial type III secretion apparatus protein (OrgA_MxiK)	JT866185.1:0.22,13.1;JT890236.1:0.3,12.6;
PF08283.6	Gemini_AL1_M	Geminivirus rep protein central domain	JT877071.1:0.24,13.1;
PF10927.3	DUF2738	Protein of unknown function (DUF2738)	JT902965.1:0.52,11.3;
PF09015.5	NgoMIV_restric	NgoMIV restriction enzyme	JT852745.1:0.56,11.1;
PF11811.3	DUF3331	Domain of unknown function (DUF3331)	JT894198.1:0.38,12.2;
PF14448.1	Nuc_N	Nuclease N terminal	JT897333.1:0.42,12.1;
PF08426.5	ICE2	ICE2	JT892685.1:0.033,14.8;JT868682.1:0.24,11.9;
PF06319.7	DUF1052	Protein of unknown function (DUF1052)	JT901243.1:0.17,13.1;JT850137.1:0.55,11.4;
PF05081.7	DUF682	Protein of unknown function (DUF682)	JT873565.1:0.23,12.9;
PF09683.5	Lactococcin_972	Bacteriocin (Lactococcin_972)	JT902727.1:0.47,12.7;
PF03557.10	Bunya_G1	Bunyavirus glycoprotein G1	JT895004.1:0.55,9.9;
PF07115.6	DUF1371	Protein of unknown function (DUF1371)	JT880482.1:0.26,13.3;
PF13645.1	YkuD_2	L,D-transpeptidase catalytic domain	JT885154.1:0.034,15.3;
PF12199.3	efb-c	Extracellular fibrinogen binding protein C terminal	JT895580.1:0.43,12.4;
PF08816.6	Ivy	Inhibitor of vertebrate lysozyme (Ivy)	JT865392.1:0.093,14.6;JT888297.1:0.23,13.4;
PF13050.1	DUF3911	Protein of unknown function (DUF3911)	JT904418.1:0.25,13.3;
PF03049.9	Herpes_UL79	UL79 family	JT852557.1:0.0078,17.2;
PF11175.3	DUF2961	Protein of unknown function (DUF2961)	JT905465.1:0.51,11.5;
PF03802.9	CitX	Apo-citrate lyase phosphoribosyl-dephospho-CoA transferase	JT846865.1:3.6,8.9;
PF12119.3	DUF3581	Protein of unknown function (DUF3581)	JT898399.1:0.52,11.4;
PF11252.3	DUF3051	Protein of unknown function (DUF3051)	JT850283.1:0.16,13.3;JT857267.1:0.35,12.2;JT870896.1:0.63,11.4;
PF07444.6	Ycf66_N	Ycf66 protein N-terminus	JT858489.1:0.066,14.8;
PF01307.12	Plant_vir_prot	Plant viral movement protein	JT869418.1:0.32,12.6;
PF10920.3	DUF2705	Protein of unknown function (DUF2705)	JT883200.1:0.9,10.6;
PF08362.6	TetR_C_3	YcdC-like protein, C-terminal region	JT897151.1:0.68,11.6;
PF02951.9	GSH-S_N	Prokaryotic glutathione synthetase, N-terminal domain	JT852990.1:0.36,12.6;
PF07190.6	DUF1406	Protein of unknown function (DUF1406)	JT896448.1:0.002,19.8;JT853880.1:0.12,14.0;
PF04342.7	DUF486	Protein of unknown function, DUF486	JT895300.1:0.16,13.9;
PF02556.9	SecB	Preprotein translocase subunit SecB	JT888357.1:0.28,12.7;
PF14347.1	DUF4399	Domain of unknown function (DUF4399)	JT864933.1:0.022,16.6;
PF00507.14	Oxidored_q4	NADH-ubiquinone/plastoquinone oxidoreductase, chain 3	JT864781.1:0.32,12.7;
PF03830.10	PTSIIB_sorb	PTS system sorbose subfamily IIB component	JT860290.1:0.68,11.7;
PF09117.5	MiAMP1	MiAMP1	JT859357.1:0.086,15.2;
PF07363.6	DUF1484	Protein of unknown function (DUF1484)	JT884335.1:1.4,11.1;
PF01185.13	Hydrophobin	Fungal hydrophobin	JT868779.1:0.053,15.9;
PF15208.1	Rab15_effector	Rab15 effector	JT902453.1:0.27,12.6;
PF14201.1	DUF4318	Domain of unknown function (DUF4318)	JT885491.1:0.69,11.7;
PF13069.1	DUF3933	Protein of unknown function (DUF3933)	JT859455.1:0.14,13.8;
PF03135.9	CagE_TrbE_VirB	CagE, TrbE, VirB family, component of type IV transporter system	JT890356.1:0.14,13.9;
PF13961.1	DUF4219	Domain of unknown function (DUF4219)	JT892011.1:0.31,12.4;
PF09194.5	Endonuc-BsobI	Restriction endonuclease BsobI	JT875188.1:0.23,12.3;
PF13544.1	N_methyl_2	Type IV pilin N-term methylation site GFxxxE	JT866044.1:0.48,11.9;
PF07376.6	Prosystemin	Prosystemin	JT859399.1:0.69,11.2;
PF06989.7	BAALC_N	BAALC N-terminus	JT853403.1:0.34,13.2;
PF12027.3	DUF3514	Protein of unknown function (DUF3514)	JT893161.1:0.0075,17.5;JT904118.1:0.15,13.2;
PF01518.11	PolyG_pol	Sigma NS protein	JT897822.1:0.13,12.7;
PF13127.1	DUF3955	Protein of unknown function (DUF3955)	JT888785.1:0.11,13.9;
PF05606.6	DUF777	Borrelia burgdorferi protein of unknown function (DUF777)	JT901611.1:0.26,12.4;
PF10786.4	G6PD_bact	Glucose-6-phosphate 1-dehydrogenase (EC 1.1.1.49)	JT894547.1:0.28,12.5;
PF15476.1	SAP25	Histone deacetylase complex subunit SAP25	JT871624.1:0.15,13.5;
PF15354.1	KAAG1	Kidney-associated antigen 1	JT862231.1:0.019,17.2;
PF12239.3	DUF3605	Protein of unknown function (DUF3605)	JT896580.1:0.18,13.5;
PF07964.6	Red1	Rec10 / Red1	JT891913.1:1.5,8.9;JT858182.1:2.3,8.2;
PF02074.10	Peptidase_M32	Carboxypeptidase Taq (M32) metallopeptidase	JT868156.1:1,9.9;
PF09260.6	DUF1966	Domain of unknown function (DUF1966)	JT855623.1:0.31,13.0;
PF09652.5	Cas_VVA1548	Putative CRISPR-associated protein (Cas_VVA1548)	JT880497.1:0.46,12.4;
PF11235.3	Med25_SD1	Mediator complex subunit 25 synapsin 1	JT888368.1:0.65,12.2;
PF15422.1	DUF4626	Domain of unknown function (DUF4626)	JT885047.1:3.3,9.6;
PF14026.1	DUF4242	Protein of unknown function (DUF4242)	JT889285.1:0.22,13.5;
PF13139.1	DUF3981	Domain of unknown function (DUF3981)	JT886255.1:0.053,15.4;
PF07357.6	DRAT	Dinitrogenase reductase ADP-ribosyltransferase (DRAT)	JT852276.1:0.027,15.6;JT857767.1:0.23,12.6;JT856817.1:0.31,12.1;
PF12521.3	DUF3724	Protein of unknown function (DUF3724)	JT848154.1:0.93,11.2;
PF04257.9	Exonuc_V_gamma	Exodeoxyribonuclease V, gamma subunit	JT876484.1:0.073,13.0;JT867420.1:0.12,12.3;
PF15570.1	Imm24	Immunity protein 24	JT853663.1:0.014,17.0;JT865530.1:0.11,14.1;JT859828.1:0.13,13.9;JT900670.1:0.16,13.6;JT904422.1:0.28,12.8;JT900664.1:0.39,12.4;
PF09660.5	DUF2397	Protein of unknown function (DUF2397)	JT879368.1:0.18,12.3;JT884055.1:2.9,8.3;
PF11441.3	MxiM	Pilot protein MxiM	JT881315.1:0.32,13.0;JT901353.1:0.49,12.4;
PF11007.3	CotJA	Spore coat associated protein JA (CotJA)	JT895057.1:0.16,13.5;
PF06861.6	BALF1	BALF1 protein	JT877438.1:0.34,12.2;JT847212.1:0.38,12.1;
PF02603.11	Hpr_kinase_N	HPr Serine kinase N terminus	JT848265.1:0.23,13.1;
PF11073.3	NSs	Rift valley fever virus non structural protein (NSs) like	JT862839.1:0.29,12.3;
PF08133.6	Nuclease_act	Anticodon nuclease activator family	JT847532.1:0.45,11.9;
PF02241.13	MCR_beta	Methyl-coenzyme M reductase beta subunit, C-terminal domain	JT888766.1:0.33,12.1;
PF05381.7	Peptidase_C21	Tymovirus endopeptidase	JT898977.1:0.2,13.6;
PF06407.6	BDV_P40	Borna disease virus P40 protein	JT884330.1:0.6,10.8;
PF12132.3	DUF3587	Protein of unknown function (DUF3587)	JT870972.1:0.049,14.8;
PF00212.13	ANP	Atrial natriuretic peptide	JT891898.1:0.061,15.3;
PF07392.7	P19Arf_N	Cyclin-dependent kinase inhibitor 2a p19Arf N-terminus	JT855989.1:0.15,14.1;
PF09882.4	DUF2109	Predicted membrane protein (DUF2109)	JT876200.1:0.027,16.3;JT896565.1:0.029,16.2;JT849660.1:3,9.8;
PF11322.3	DUF3124	Protein of unknown function (DUF3124)	JT866822.1:0.18,13.6;
PF01539.12	HCV_env	Hepatitis C virus envelope glycoprotein E1	JT896370.1:0.001,20.5;JT899069.1:0.0098,17.3;JT853331.1:0.17,13.2;JT869079.1:0.44,11.9;
PF03504.8	Chlam_OMP6	Chlamydia cysteine-rich outer membrane protein 6	JT902493.1:0.46,12.7;
PF15049.1	DUF4534	Protein of unknown function (DUF4534)	JT884304.1:0.11,14.0;JT890170.1:0.19,13.3;JT890548.1:0.4,12.2;JT854958.1:0.99,10.9;JT853319.1:1.7,10.2;
PF01107.13	MP	Viral movement protein (MP)	JT871343.1:0.46,11.8;
PF14154.1	DUF4306	Domain of unknown function (DUF4306)	JT855176.1:0.047,15.5;
PF14057.1	GGGtGRT	GGGtGRT protein	JT880376.1:0.24,12.1;
PF15206.1	FAM209	FAM209 family	JT889249.1:0.12,14.1;JT850442.1:0.39,12.4;
PF12964.2	DUF3853	Protein of unknown function (DUF3853)	JT882980.1:0.25,13.1;
PF09312.6	SurA_N	SurA N-terminal domain	JT856285.1:8.1,8.2;
PF05032.7	Spo12	Spo12 family	JT875607.1:6.2,8.4;
PF00223.14	PsaA_PsaB	Photosystem I psaA/psaB protein	JT898764.1:0.003,17.7;
PF09387.5	MRP	Mitochondrial RNA binding protein MRP	JT893550.1:0.43,12.2;
PF07243.6	Phlebovirus_G1	Phlebovirus glycoprotein G1	JT899759.1:0.16,12.1;
PF09025.5	YopR_core	YopR Core	JT874431.1:0.42,12.5;
PF06822.7	DUF1235	Protein of unknown function (DUF1235)	JT878925.1:0.079,13.8;JT849650.1:0.63,10.9;
PF15209.1	IL31	Interleukin 31	JT864091.1:0.23,13.0;
PF11398.3	DUF2813	Protein of unknown function (DUF2813)	JT876526.1:0.2,12.6;
PF10468.4	Inhibitor_I68	Carboxypeptidase inhibitor I68	JT897688.1:0.051,15.7;
PF13267.1	DUF4058	Protein of unknown function (DUF4058)	JT878192.1:0.023,15.8;
PF02554.9	CstA	Carbon starvation protein CstA	JT893063.1:0.26,11.8;
PF07764.6	Omega_Repress	Omega Transcriptional Repressor	JT868119.1:0.33,13.2;JT857584.1:1.1,11.5;
PF00863.14	Peptidase_C4	Peptidase family C4	JT903342.1:0.15,12.9;JT872533.1:0.44,11.4;
PF06416.7	DUF1076	Protein of unknown function (DUF1076)	JT876287.1:0.38,12.4;
PF07937.6	DUF1686	Protein of unknown function (DUF1686)	JT904071.1:0.46,12.0;
PF14152.1	YfhE	YfhE-like protein	JT901503.1:0.17,13.7;JT881304.1:0.46,12.3;
PF11474.3	N-Term_TEN	Telomerase reverse transcriptase TEN domain	JT850275.1:0.38,12.0;
PF14797.1	SEEEED	Serine-rich region of AP3B1, clathrin-adaptor complex	JT888359.1:0.92,11.6;
PF07378.6	FlbT	Flagellar protein FlbT	JT891235.1:0.56,12.0;
