# Supplementary material for: A Phylogenomic Framework and Divergence History of Cephalochordata Amphioxus
Source: Front Physiol. 2018 Dec 18;9:1833. doi: 10.3389/fphys.2018.01833 (PMC6305399; doi:10.3389/fphys.2018.01833)
Supplement: TABLE S6 — Information of lineage-specific domains in Branchiostoma japonicum. [file Table_6.xlsx]

## Sheet: BJA
Table S6 Information of lineage-specific domains in Branchiostoma japonicum.
Pfam id	Pfam name	Pfam description	Align info(alu)
PF12818.2	Tegument_dsDNA	dsDNA viral tegument protein	Unigene46909_BJA:0.18,11.9;
PF08057.6	Ery_res_leader2	Erythromycin resistance leader peptide	Unigene27533_BJA:0.25,12.7;
PF06560.6	GPI	Glucose-6-phosphate isomerase (GPI)	Unigene34875_BJA:0.033,14.4;
PF11993.3	Ribosomal_S4Pg	Ribosomal S4P (gammaproteobacterial)	Unigene59512_BJA:0.03,15.3;
PF02983.9	Pro_Al_protease	Alpha-lytic protease prodomain	CL119.Contig12_BJA:0.092,13.9;CL119.Contig7_BJA:0.092,13.9;CL119.Contig11_BJA:0.11,13.7;CL119.Contig6_BJA:0.11,13.7;
PF15342.1	FAM212	FAM212 family	Unigene3069_BJA:0.76,10.6;
PF12899.2	Glyco_hydro_100	Alkaline and neutral invertase	Unigene61926_BJA:0.2,11.2;
PF04497.7	Pox_E2-like	Poxviridae protein	Unigene15401_BJA:0.059,12.6;CL2845.Contig3_BJA:0.11,11.8;
PF15660.1	Imm49	Immunity protein 49	CL2368.Contig1_BJA:0.2,12.9;
PF01904.13	DUF72	Protein of unknown function DUF72	Unigene8438_BJA:0.09,13.7;
PF06323.6	Phage_antiter_Q	Phage antitermination protein Q	CL2909.Contig1_BJA:0.21,12.2;
PF11403.3	Yeast_MT	Yeast metallothionein	Unigene390_BJA:0.19,13.1;Unigene14194_BJA:0.21,13.0;Unigene18409_BJA:4.5,8.7;
PF06108.7	DUF952	Protein of unknown function (DUF952)	Unigene19522_BJA:0.11,13.6;
PF10395.4	Utp8	Utp8 family	CL984.Contig1_BJA:0.12,11.9;CL984.Contig2_BJA:0.12,11.9;Unigene56115_BJA:0.14,11.7;
PF04648.7	MF_alpha	Yeast mating factor alpha hormone	Unigene15786_BJA:2.2,9.8;Unigene15788_BJA:2.2,9.8;
PF12094.3	DUF3570	Protein of unknown function (DUF3570)	CL4982.Contig1_BJA:0.15,12.1;Unigene23227_BJA:0.16,11.9;
PF10420.4	IL12p40_C	Cytokine interleukin-12p40 C-terminus	Unigene30594_BJA:0.086,14.2;Unigene16342_BJA:0.29,12.5;
PF01644.12	Chitin_synth_1	Chitin synthase	Unigene30881_BJA:0.074,14.1;
PF08486.5	SpoIID	Stage II sporulation protein	CL329.Contig1_BJA:0.45,12.0;
PF13208.1	TerB-N	TerB-N	Unigene31187_BJA:0.16,12.6;
PF14033.1	DUF4246	Protein of unknown function (DUF4246)	CL4838.Contig1_BJA:0.0039,17.1;CL4838.Contig2_BJA:0.0039,17.1;
PF00358.15	PTS_EIIA_1	phosphoenolpyruvate-dependent sugar phosphotransferase system, EIIA 1	Unigene19206_BJA:0.083,13.7;CL11397.Contig1_BJA:0.32,11.8;
PF07207.6	Lir1	Light regulated protein Lir1	Unigene5715_BJA:2,9.8;
PF03573.8	OprD	outer membrane porin, OprD family	Unigene2662_BJA:7.7e-17,62.4;
PF00600.14	Flu_NS1	Influenza non-structural protein (NS1)	Unigene62117_BJA:0.067,13.6;Unigene32320_BJA:0.13,12.6;
PF14060.1	DUF4252	Domain of unknown function (DUF4252)	Unigene35999_BJA:0.13,13.0;Unigene8896_BJA:0.34,11.7;Unigene28134_BJA:2.6,8.8;
PF06773.6	Bim_N	Bim protein N-terminus	CL5186.Contig1_BJA:0.64,11.0;
PF10380.4	CRF1	Transcription factor CRF1	Unigene556_BJA:0.099,14.2;
PF01272.14	GreA_GreB	Transcription elongation factor, GreA/GreB, C-term	Unigene20316_BJA:0.25,12.3;
PF07951.7	Toxin_R_bind_C	Clostridium neurotoxin, C-terminal receptor binding	Unigene58190_BJA:0.18,12.7;
PF09965.4	DUF2199	Uncharacterized protein conserved in bacteria (DUF2199)	Unigene4621_BJA:0.11,13.6;
PF08745.6	UPF0278	UPF0278 family	Unigene46189_BJA:0.036,14.5;
PF09892.4	DUF2119	Uncharacterized protein conserved in archaea (DUF2119)	CL66.Contig2_BJA:0.17,12.4;Unigene38029_BJA:0.34,11.4;
PF14192.1	DUF4314	Domain of unknown function (DUF4314)	Unigene23989_BJA:0.4,12.2;
PF06430.7	L_lactis_RepB_C	Lactococcus lactis RepB C-terminus	Unigene22836_BJA:0.016,16.5;
PF05116.8	S6PP	Sucrose-6F-phosphate phosphohydrolase	Unigene20004_BJA:0.0033,18.0;
PF11138.3	DUF2911	Protein of unknown function (DUF2911)	Unigene11762_BJA:0.44,11.4;
PF08787.6	Alginate_lyase2	Alginate lyase	Unigene1083_BJA:0.086,13.7;
PF13590.1	DUF4136	Domain of unknown function (DUF4136)	CL196.Contig1_BJA:0.13,13.6;
PF08798.6	CRISPR_assoc	CRISPR associated protein	Unigene13023_BJA:0.044,14.8;CL2780.Contig1_BJA:0.14,13.2;CL2780.Contig3_BJA:0.14,13.2;CL2780.Contig4_BJA:0.14,13.2;
PF10081.4	Abhydrolase_9	Alpha/beta-hydrolase family	CL10672.Contig1_BJA:0.21,11.5;
PF15229.1	POM121	POM121 family	CL9881.Contig1_BJA:0.0052,17.5;
PF10001.4	DUF2242	Uncharacterized protein conserved in bacteria (DUF2242)	Unigene3006_BJA:0.24,12.5;
PF10689.4	DUF2496	Protein of unknown function (DUF2496)	Unigene2718_BJA:0.04,14.7;
PF03762.12	VOMI	Vitelline membrane outer layer protein I (VOMI)	Unigene51486_BJA:0.18,12.9;
PF07379.6	DUF1494	Protein of unknown function (DUF1494)	Unigene43502_BJA:0.18,12.9;
PF04747.7	DUF612	Protein of unknown function, DUF612	Unigene56862_BJA:0.4,10.8;Unigene57830_BJA:0.91,9.6;
PF07238.9	PilZ	PilZ domain	CL7620.Contig1_BJA:0.27,12.5;
PF11413.3	HIF-1	Hypoxia-inducible factor-1	Unigene5400_BJA:0.1,13.0;
PF07990.7	NABP	Nucleic acid binding protein NABP	Unigene5705_BJA:0.24,11.9;Unigene25690_BJA:0.32,11.5;
PF06857.6	ACP	Malonate decarboxylase delta subunit (MdcD)	Unigene38087_BJA:0.13,13.4;
PF04730.7	Agro_virD5	Agrobacterium VirD5 protein	Unigene15387_BJA:0.15,11.4;
PF12893.2	Lumazine_bd_2	Putative lumazine-binding	Unigene43969_BJA:0.43,12.3;
PF15287.1	KRBA1	KRBA1 family repeat	CL5752.Contig1_BJA:0.4,11.3;CL5752.Contig2_BJA:0.4,11.3;CL5752.Contig3_BJA:0.4,11.3;CL5752.Contig4_BJA:0.4,11.3;Unigene1075_BJA:0.4,11.3;Unigene15728_BJA:0.4,11.3;
PF01890.11	CbiG_C	Cobalamin synthesis G C-terminus	Unigene20470_BJA:0.029,15.8;
PF10769.4	DUF2594	Protein of unknown function (DUF2594)	CL8149.Contig1_BJA:0.03,15.6;
PF11246.3	Phage_gp53	Base plate wedge protein 53	Unigene20880_BJA:0.27,11.9;
PF03258.9	Baculo_FP	Baculovirus FP protein	Unigene29684_BJA:0.088,13.1;
PF02041.11	Auxin_BP	Auxin binding protein	Unigene12880_BJA:0.2,12.3;Unigene18041_BJA:0.22,12.2;
PF03077.9	VacA2	Putative vacuolating cytotoxin	Unigene2613_BJA:0.17,12.7;
PF00761.15	Polyoma_coat2	Polyomavirus coat protein	Unigene4659_BJA:0.31,11.7;
PF03216.8	Rhabdo_ncap_2	Rhabdovirus nucleoprotein	Unigene8409_BJA:0.1,12.5;
PF15594.1	Imm30	Immunity protein 30	CL4774.Contig1_BJA:0.31,12.4;
PF11806.3	DUF3327	Domain of unknown function (DUF3327)	Unigene12912_BJA:0.06,14.9;
PF10784.4	Plasmid_stab_B	Plasmid stability protein	Unigene11162_BJA:0.14,13.0;
PF12079.3	DUF3558	Protein of unknown function (DUF3558)	Unigene7377_BJA:0.21,12.5;
PF15414.1	DUF4621	Protein of unknown function (DUF4621)	Unigene27745_BJA:0.21,11.5;
PF09467.5	Yopt	Hypothetical protein Yopt	Unigene27668_BJA:0.064,14.3;
PF07075.6	DUF1343	Protein of unknown function (DUF1343)	CL6792.Contig5_BJA:0.31,11.1;
PF10564.4	MAR_sialic_bdg	Sialic-acid binding micronemal adhesive repeat	Unigene25031_BJA:0.17,12.9;
PF02113.10	Peptidase_S13	D-Ala-D-Ala carboxypeptidase 3 (S13) family	Unigene29754_BJA:0.15,11.8;
PF10897.3	DUF2713	Protein of unknown function (DUF2713)	Unigene24595_BJA:0.26,11.7;
PF01024.14	Colicin	Colicin pore forming domain	Unigene12109_BJA:0.065,14.0;
PF06298.6	PsbY	Photosystem II protein Y (PsbY)	Unigene40579_BJA:0.097,13.4;
PF09308.5	LuxQ-periplasm	LuxQ, periplasmic	CL3292.Contig1_BJA:0.26,11.8;
PF14123.1	DUF4290	Domain of unknown function (DUF4290)	Unigene41883_BJA:0.18,12.2;
PF10364.4	NKWYS	Putative capsular polysaccharide synthesis protein	Unigene52612_BJA:0.0089,17.0;
PF09459.5	EB_dh	Ethylbenzene dehydrogenase	Unigene23922_BJA:0.061,14.0;
PF14481.1	Fimbrial_PilY2	Type 4 fimbrial biogenesis protein PilY2	Unigene27362_BJA:0.15,12.7;Unigene55751_BJA:0.43,11.2;
PF07906.8	Toxin_15	ShET2 enterotoxin, N-terminal region	CL8840.Contig1_BJA:0.17,12.6;
PF02380.10	Papo_T_antigen	T-antigen specific domain	Unigene11959_BJA:0.14,13.3;
PF13756.1	Stimulus_sens_1	Stimulus-sensing domain	Unigene23667_BJA:4.1,9.0;CL660.Contig1_BJA:8,8.1;
PF02011.10	Glyco_hydro_48	Glycosyl hydrolase family 48	Unigene62533_BJA:0.23,10.8;
PF14025.1	DUF4241	Protein of unknown function (DUF4241)	CL3239.Contig1_BJA:0.16,13.0;CL3239.Contig3_BJA:0.17,12.9;
PF12083.3	DUF3560	Domain of unknown function (DUF3560)	CL7354.Contig1_BJA:4.1,8.7;Unigene31295_BJA:6.6,8.0;
PF01065.14	Adeno_hexon	Hexon, adenovirus major coat protein, N-terminal domain	Unigene10156_BJA:5.1,7.1;
PF03396.10	Pox_RNA_pol_35	Poxvirus DNA-directed RNA polymerase, 35 kD subunit	Unigene23484_BJA:0.14,12.4;
PF09910.4	DUF2139	Uncharacterized protein conserved in archaea (DUF2139)	Unigene44391_BJA:0.26,11.5;
PF06716.6	DUF1201	Protein of unknown function (DUF1201)	Unigene18895_BJA:0.021,15.8;
PF03269.9	DUF268	Caenorhabditis protein of unknown function, DUF268	CL7350.Contig1_BJA:0.09,13.6;CL7350.Contig3_BJA:0.09,13.6;
PF07619.6	DUF1581	Protein of unknown function (DUF1581)	CL9262.Contig1_BJA:0.031,15.5;CL9262.Contig2_BJA:0.031,15.5;
PF03692.10	CxxCxxCC	Putative zinc- or iron-chelating domain	CL1286.Contig1_BJA:0.27,13.0;
PF02119.11	FlgI	Flagellar P-ring protein	Unigene46781_BJA:0.012,15.5;
PF09231.5	RDV-p3	Rice dwarf virus p3	Unigene31952_BJA:0.17,10.5;
PF02334.11	RTP	Replication terminator protein	Unigene63643_BJA:0.25,12.5;
PF09661.5	DUF2398	Protein of unknown function (DUF2398)	Unigene2593_BJA:0.066,13.2;
PF01373.12	Glyco_hydro_14	Glycosyl hydrolase family 14	CL3116.Contig1_BJA:0.15,12.0;
PF09314.6	DUF1972	Domain of unknown function (DUF1972)	Unigene41544_BJA:0.23,12.1;
PF12458.3	DUF3686	ATPase involved in DNA repair	Unigene52747_BJA:0.12,11.9;
PF14233.1	DUF4335	Domain of unknown function (DUF4335)	Unigene24625_BJA:0.088,13.5;
PF08989.5	DUF1896	Domain of unknown function (DUF1896)	CL855.Contig5_BJA:0.2,12.8;CL855.Contig4_BJA:0.28,12.3;Unigene20006_BJA:0.29,12.2;CL431.Contig4_BJA:0.3,12.2;
PF03502.8	Channel_Tsx	Nucleoside-specific channel-forming protein, Tsx	Unigene30087_BJA:0.059,14.4;
PF10984.3	DUF2794	Protein of unknown function (DUF2794)	Unigene23390_BJA:0.033,15.3;
PF04229.9	GrpB	GrpB protein	CL378.Contig1_BJA:0.26,12.2;
PF03002.10	Somatostatin	Somatostatin/Cortistatin family	Unigene20173_BJA:0.15,12.9;
PF12219.3	End_tail_spike	Catalytic domain of bacteriophage endosialidase	Unigene11952_BJA:0.23,12.5;
PF06530.7	Phage_antitermQ	Phage antitermination protein Q	Unigene24450_BJA:0.028,15.2;CL8280.Contig1_BJA:0.042,14.6;Unigene36705_BJA:0.14,13.0;
PF00823.14	PPE	PPE family	Unigene10522_BJA:0.22,12.6;
PF07483.6	W_rich_C	Tryptophan-rich Synechocystis species C-terminal domain	Unigene27794_BJA:0.17,12.8;Unigene20136_BJA:0.42,11.5;
PF06134.6	RhaA	L-rhamnose isomerase (RhaA)	Unigene53401_BJA:0.3,11.2;
PF00524.13	PPV_E1_N	E1 Protein, N terminal domain	Unigene10599_BJA:0.049,15.1;
PF08762.5	CRPV_capsid	CRPV capsid protein like	CL1039.Contig1_BJA:0.36,11.5;
PF04211.8	MtrC	Tetrahydromethanopterin S-methyltransferase, subunit C	Unigene18388_BJA:0.092,13.0;Unigene60212_BJA:0.22,11.8;
PF05727.6	UPF0228	Uncharacterised protein family (UPF0228)	CL12261.Contig1_BJA:0.069,14.1;
PF03652.10	UPF0081	Uncharacterised protein family (UPF0081)	Unigene14089_BJA:0.086,14.2;Unigene57133_BJA:0.27,12.6;
PF11585.3	Stomoxyn	Insect antimicrobial peptide, stomoxyn	Unigene39362_BJA:0.14,13.2;
PF02763.9	Diphtheria_C	Diphtheria toxin, C domain	Unigene65714_BJA:0.022,15.4;
PF02406.12	MmoB_DmpM	MmoB/DmpM family	Unigene24052_BJA:0.11,13.7;Unigene13662_BJA:0.12,13.6;
PF01270.12	Glyco_hydro_8	Glycosyl hydrolases family 8	CL2090.Contig2_BJA:0.31,11.0;
PF11062.3	DUF2863	Protein of unknown function (DUF2863)	CL7295.Contig1_BJA:1.4,8.2;
PF15374.1	CCDC71L	Coiled-coil domain-containing protein 71L	Unigene2517_BJA:0.15,12.6;
PF00585.13	Thr_dehydrat_C	C-terminal regulatory domain of Threonine dehydratase	CL6094.Contig1_BJA:0.0038,18.0;CL6094.Contig3_BJA:0.0038,18.0;CL6094.Contig5_BJA:0.0038,18.0;Unigene1101_BJA:0.0038,18.0;CL12402.Contig1_BJA:0.0055,17.5;CL12402.Contig2_BJA:0.0055,17.5;CL12402.Contig3_BJA:0.0055,17.5;CL12402.Contig6_BJA:0.0055,17.5;CL12402.Contig4_BJA:0.0096,16.7;CL12402.Contig7_BJA:0.0096,16.7;
PF05555.6	DUF762	Coxiella burnetii protein of unknown function (DUF762)	Unigene34268_BJA:0.1,13.1;
PF13296.1	T6SS_Vgr	Putative type VI secretion system Rhs element Vgr	Unigene29232_BJA:0.034,15.2;Unigene25712_BJA:0.1,13.6;
PF05421.6	DUF751	Protein of unknown function (DUF751)	CL114.Contig2_BJA:0.78,11.3;Unigene56370_BJA:2.8,9.5;
PF11972.3	HTH_13	HTH DNA binding domain	Unigene60611_BJA:0.16,13.1;
PF11666.3	DUF2933	Protein of unknown function (DUF2933)	Unigene43477_BJA:0.18,12.6;
PF11697.3	DUF3293	Protein of unknown function (DUF3293)	Unigene23545_BJA:0.22,12.8;Unigene33156_BJA:0.25,12.7;
PF13977.1	TetR_C_6	Bacterial transcriptional repressor	CL2569.Contig2_BJA:0.33,12.2;CL2569.Contig1_BJA:0.37,12.0;
PF15569.1	Imm21	Immunity protein 21	Unigene7310_BJA:3.7,8.6;
PF03228.9	Adeno_VII	Adenoviral core protein VII	Unigene7244_BJA:3.4,9.5;
PF10715.4	REGB_T4	Endoribonuclease RegB T4-bacteriophage encoded	Unigene20448_BJA:0.09,14.1;Unigene12519_BJA:0.39,12.0;
PF06856.6	DUF1251	Protein of unknown function (DUF1251)	Unigene21720_BJA:0.028,15.1;Unigene22080_BJA:0.31,11.8;
PF09007.6	EBP50_C-term	EBP50, C-terminal	CL2520.Contig1_BJA:0.3,12.2;CL2520.Contig2_BJA:0.3,12.2;
PF11542.3	Mdv1	Mitochondrial division protein 1	Unigene10974_BJA:0.0075,17.4;
PF09870.4	DUF2097	Uncharacterized protein conserved in archaea (DUF2097)	Unigene11487_BJA:0.24,12.7;
PF13995.1	YebF	YebF-like protein	Unigene42624_BJA:0.098,13.9;
PF08932.5	DUF1914	Domain of unknown function (DUF1914)	Unigene7715_BJA:0.13,13.6;
PF05580.7	Peptidase_S55	SpoIVB peptidase S55	Unigene31202_BJA:0.51,11.0;
PF11898.3	DUF3418	Domain of unknown function (DUF3418)	Unigene6830_BJA:0.012,15.3;CL3615.Contig3_BJA:0.018,14.7;
PF04197.7	Birna_RdRp	Birnavirus RNA dependent RNA polymerase (VP1)	Unigene32521_BJA:0.019,14.3;
PF11537.3	DUF3227	Protein of unknown function (DUF3227)	Unigene18171_BJA:0.13,13.6;
PF07203.6	DUF1412	Protein of unknown function (DUF1412)	CL8954.Contig1_BJA:0.17,13.0;CL8954.Contig2_BJA:0.17,13.0;
PF04362.9	Iron_traffic	Bacterial Fe(2+) trafficking	Unigene30254_BJA:0.044,14.4;
PF11996.3	DUF3491	Protein of unknown function (DUF3491)	CL112.Contig1_BJA:0.34,9.6;
PF05054.7	DUF673	Protein of unknown function (DUF673)	Unigene27706_BJA:0.058,13.2;
PF03872.8	RseA_N	Anti sigma-E protein RseA, N-terminal domain	Unigene40404_BJA:0.14,13.6;
PF09157.6	TruB-C_2	Pseudouridine synthase II TruB, C-terminal	CL5828.Contig2_BJA:0.25,12.5;
PF05037.8	DUF669	Protein of unknown function (DUF669)	Unigene33036_BJA:0.12,13.5;
PF14457.1	Prok-E2_A	Prokaryotic E2 family A	Unigene49063_BJA:0.13,13.0;
PF09077.6	Phage-MuB_C	Mu B transposition protein, C terminal	Unigene12109_BJA:0.027,15.3;
PF07094.6	DUF1357	Protein of unknown function (DUF1357)	Unigene21160_BJA:0.032,14.9;
PF14148.1	YhdB	YhdB-like protein	Unigene21083_BJA:0.27,12.2;
PF09946.4	DUF2178	Predicted membrane protein (DUF2178)	Unigene50794_BJA:0.36,11.8;
PF12727.2	PBP_like	PBP superfamily domain	Unigene31538_BJA:0.035,14.3;
PF13356.1	DUF4102	Domain of unknown function (DUF4102)	CL1744.Contig1_BJA:0.35,12.0;CL1744.Contig6_BJA:0.35,12.0;CL1744.Contig2_BJA:0.36,11.9;CL1744.Contig4_BJA:0.37,11.9;
PF06855.7	DUF1250	Protein of unknown function (DUF1250)	Unigene47060_BJA:1.1,10.0;
PF06970.6	RepA_N	Replication initiator protein A (RepA) N-terminus	CL10020.Contig1_BJA:0.35,11.9;
PF04036.7	DUF372	Domain of unknown function (DUF372)	Unigene50954_BJA:0.31,11.8;
PF04435.13	SPK	Domain of unknown function (DUF545)	Unigene1790_BJA:0.24,12.6;
PF12153.3	CAP18_C	LPS binding domain of CAP18 (C terminal)	Unigene7509_BJA:0.16,12.9;
PF14092.1	DUF4270	Domain of unknown function (DUF4270)	Unigene33326_BJA:0.25,11.2;
PF01742.12	Peptidase_M27	Clostridial neurotoxin zinc protease	Unigene25613_BJA:0.09,12.9;
PF08135.6	EPV_E5	Major transforming protein E5 family	Unigene27265_BJA:0.23,12.7;
PF02925.11	gpD	Bacteriophage scaffolding protein D	CL3111.Contig2_BJA:0.33,12.0;
PF12849.2	PBP_like_2	PBP superfamily domain	CL7502.Contig2_BJA:0.03,15.0;Unigene3089_BJA:0.097,13.4;
PF03085.10	RAP-1	Rhoptry-associated protein 1 (RAP-1)	CL5566.Contig2_BJA:0.037,14.6;
PF15037.1	IL17_R_N	Interleukin-17 receptor extracellular region	Unigene32764_BJA:0.043,14.1;
PF06519.6	TolA	TolA C-terminal	Unigene6855_BJA:0.13,13.5;
PF12386.3	Peptidase_C71	Pseudomurein endo-isopeptidase Pei	Unigene49041_BJA:0.26,11.9;
PF10295.4	DUF2406	Uncharacterised protein (DUF2406)	CL2733.Contig1_BJA:8.5,8.2;
PF05630.6	NPP1	Necrosis inducing protein (NPP1)	Unigene16822_BJA:0.2,12.6;
PF07598.6	DUF1561	Protein of unknown function (DUF1561)	Unigene42812_BJA:0.19,10.9;
PF10529.4	Hist_rich_Ca-bd	Histidine-rich Calcium-binding repeat region	Unigene48577_BJA:0.14,13.4;
PF05412.7	Peptidase_C33	Equine arterivirus Nsp2-type cysteine proteinase	Unigene5144_BJA:0.38,11.8;
PF06116.7	RinB	Transcriptional activator RinB	Unigene57026_BJA:0.24,12.3;
PF14902.1	DUF4494	Domain of unknown function (DUF4494)	Unigene30801_BJA:0.057,14.2;
PF11668.3	Gp_UL130	HCMV glycoprotein pUL130	Unigene44591_BJA:0.17,12.6;
PF12634.2	Inp1	Inheritance of peroxisomes protein 1	Unigene33613_BJA:0.11,13.4;Unigene8761_BJA:0.12,13.3;
PF09639.5	YjcQ	YjcQ protein	Unigene28886_BJA:0.14,13.4;Unigene23372_BJA:0.21,12.9;
PF08949.5	DUF1860	Domain of unknown function (DUF1860)	CL11813.Contig1_BJA:0.0014,19.5;
PF12778.2	PXPV	PXPV repeat (3 copies)	CL1557.Contig1_BJA:0.5,11.3;
PF05509.6	TraY	TraY domain	Unigene26300_BJA:0.18,12.8;
PF04122.7	CW_binding_2	Putative cell wall binding repeat 2	Unigene15621_BJA:0.43,12.0;
PF11196.3	DUF2834	Protein of unknown function (DUF2834)	CL1798.Contig1_BJA:0.21,13.0;
PF06266.7	HrpF	HrpF protein	Unigene55259_BJA:0.1,14.0;Unigene3693_BJA:0.36,12.2;
PF12741.2	SusD-like	Susd and RagB outer membrane lipoprotein	CL9180.Contig2_BJA:0.17,11.7;CL9180.Contig1_BJA:0.21,11.4;
PF12917.2	HD_2	HD containing hydrolase-like enzyme	Unigene10267_BJA:0.17,12.9;
PF02352.10	Decorin_bind	Decorin binding protein	Unigene10573_BJA:0.26,12.5;
PF14385.1	DUF4416	Domain of unknown function (DUF4416)	CL639.Contig1_BJA:0.014,16.4;
PF02035.10	Coagulin	Coagulin	CL10090.Contig1_BJA:0.054,14.4;
PF03628.8	PapG_C	PapG chaperone-binding domain	Unigene5650_BJA:0.02,15.8;
PF00905.17	Transpeptidase	Penicillin binding protein transpeptidase domain	Unigene39090_BJA:0.044,14.0;
PF10820.3	DUF2543	Protein of unknown function (DUF2543)	Unigene27341_BJA:0.17,13.1;
PF13984.1	MsyB	MsyB protein	CL10888.Contig1_BJA:0.21,12.8;
PF09508.5	Lact_bio_phlase	Lacto-N-biose phosphorylase	Unigene19983_BJA:0.46,9.3;
PF13052.1	DUF3913	Protein of unknown function (DUF3913)	Unigene63650_BJA:0.42,11.8;
PF04458.7	DUF505	Protein of unknown function (DUF505)	Unigene14622_BJA:0.44,9.8;
PF06884.6	DUF1264	Protein of unknown function (DUF1264)	Unigene2726_BJA:0.057,14.1;Unigene40468_BJA:0.2,12.3;
PF14320.1	Paramyxo_PCT	Phosphoprotein P region PCT disordered	Unigene20478_BJA:0.17,12.0;
PF10957.3	DUF2758	Protein of unknown function (DUF2758)	Unigene25414_BJA:0.12,13.4;CL32.Contig4_BJA:0.58,11.2;CL32.Contig6_BJA:0.58,11.2;CL32.Contig7_BJA:0.58,11.2;CL32.Contig12_BJA:0.64,11.1;CL32.Contig10_BJA:0.69,11.0;
PF13351.1	DUF4099	Protein of unknown function (DUF4099)	Unigene35728_BJA:0.096,13.8;CL7541.Contig1_BJA:0.25,12.4;
PF00508.12	PPV_E2_N	E2 (early) protein, N terminal	Unigene45850_BJA:0.14,12.6;
PF11054.3	Surface_antigen	Sporozoite TA4 surface antigen	Unigene18277_BJA:0.95,10.0;
PF07600.6	DUF1564	Protein of unknown function (DUF1564)	CL11294.Contig1_BJA:0.29,11.7;
PF02684.10	LpxB	Lipid-A-disaccharide synthetase	Unigene12397_BJA:0.43,10.4;
PF01829.11	Peptidase_A6	Peptidase A6 family	Unigene64385_BJA:0.019,15.2;
PF06671.6	DUF1174	Repeat of unknown function (DUF1174)	Unigene17420_BJA:3.3,8.6;
PF07585.6	DUF1551	Protein of unknown function (DUF1551)	CL4168.Contig1_BJA:0.019,15.1;
PF13547.1	GTA_TIM	GTA TIM-barrel-like domain	Unigene55563_BJA:0.22,11.7;
PF01611.11	Filo_glycop	Filovirus glycoprotein	Unigene15295_BJA:0.13,12.3;
PF05941.8	Chordopox_A20R	Chordopoxvirus A20R protein	Unigene53424_BJA:0.21,11.5;
PF07702.8	UTRA	UTRA domain	Unigene40228_BJA:0.23,12.3;
PF09313.6	DUF1971	Domain of unknown function (DUF1971)	Unigene43542_BJA:0.05,14.5;
PF12918.2	TcdB_N	TcdB toxin N-terminal helical domain	Unigene16912_BJA:0.068,14.5;Unigene15649_BJA:0.075,14.3;Unigene33413_BJA:0.13,13.6;CL929.Contig1_BJA:0.17,13.2;CL929.Contig4_BJA:0.17,13.2;CL929.Contig3_BJA:0.21,12.9;CL929.Contig5_BJA:0.21,12.9;
PF03769.10	Attacin_C	Attacin, C-terminal region	CL3673.Contig2_BJA:0.17,13.2;CL3673.Contig3_BJA:0.17,13.2;CL3673.Contig10_BJA:0.24,12.8;CL3673.Contig1_BJA:0.24,12.8;
PF06907.7	Latexin	Latexin	CL3009.Contig1_BJA:0.072,13.5;CL3009.Contig2_BJA:0.072,13.5;Unigene1676_BJA:0.14,12.6;
PF10630.4	DUF2476	Protein of unknown function (DUF2476)	Unigene25986_BJA:0.048,14.8;
PF08692.5	Pet20	Mitochondrial protein Pet20	Unigene5451_BJA:0.045,14.9;
PF15611.1	EH_Signature	EH_Signature domain	Unigene10365_BJA:0.046,14.0;
PF10365.4	DUF2436	Domain of unknown function (DUF2436)	CL2157.Contig9_BJA:0.0044,17.9;
PF09370.5	TIM-br_sig_trns	TIM-barrel signal transduction protein	Unigene36289_BJA:0.16,12.2;
PF10777.4	YlaC	Inner membrane protein YlaC	Unigene10115_BJA:0.09,13.6;
PF12061.3	DUF3542	Protein of unknown function (DUF3542)	Unigene39044_BJA:0.41,10.8;
PF11059.3	DUF2860	Protein of unknown function (DUF2860)	CL5632.Contig1_BJA:0.55,10.5;
PF05133.9	Phage_prot_Gp6	Phage portal protein, SPP1 Gp6-like	Unigene42822_BJA:1.7,8.4;
PF11695.3	DUF3291	Domain of unknown function (DUF3291)	Unigene28214_BJA:0.21,12.2;
PF02276.13	CytoC_RC	Photosynthetic reaction centre cytochrome C subunit	Unigene19621_BJA:0.095,13.0;
PF07388.6	A-2_8-polyST	Alpha-2,8-polysialyltransferase (POLYST)	Unigene24022_BJA:0.37,10.3;
PF06917.7	Pectate_lyase_2	Periplasmic pectate lyase	Unigene33678_BJA:0.13,11.7;
PF11646.3	DUF3258	Protein of unknown function DUF3258	CL673.Contig1_BJA:0.32,12.4;CL673.Contig2_BJA:0.32,12.4;CL673.Contig3_BJA:0.32,12.4;
PF06540.6	GMAP	Galanin message associated peptide (GMAP)	Unigene65629_BJA:0.22,12.5;
PF14490.1	HHH_4	Helix-hairpin-helix containing domain	Unigene2570_BJA:0.073,14.0;
PF15088.1	NADH_dh_m_C1	NADH dehydrogenase [ubiquinone] 1 subunit C1, mitochondrial	Unigene27357_BJA:0.32,11.7;Unigene14888_BJA:0.36,11.6;
PF11041.3	DUF2612	Protein of unknown function (DUF2612)	Unigene19561_BJA:0.21,12.4;Unigene22539_BJA:0.31,11.8;
PF10799.3	YliH	Biofilm formation protein (YliH/bssR)	Unigene38873_BJA:0.074,14.0;
PF11956.3	KCNQC3-Ank-G_bd	Ankyrin-G binding motif of KCNQ2-3	Unigene1445_BJA:1.2,10.5;
PF01707.11	Peptidase_C9	Peptidase family C9	Unigene27680_BJA:0.0082,17.0;Unigene7665_BJA:0.28,12.0;
PF08505.5	MMR1	Mitochondrial Myo2 receptor-related protein	Unigene49589_BJA:0.21,12.8;Unigene4263_BJA:8.8,7.5;
PF10788.4	DUF2603	Protein of unknown function (DUF2603)	Unigene4457_BJA:0.07,14.1;
PF06693.6	DUF1190	Protein of unknown function (DUF1190)	Unigene9998_BJA:0.2,12.9;
PF00543.17	P-II	Nitrogen regulatory protein P-II	Unigene5839_BJA:0.28,12.9;
PF02123.11	RdRP_4	Viral RNA-directed RNA-polymerase	CL4844.Contig1_BJA:0.43,10.5;
PF09214.6	Prd1-P2	Bacteriophage Prd1, adsorption protein P2	Unigene29335_BJA:0.025,14.4;
PF01376.13	Enterotoxin_b	Heat-labile enterotoxin beta chain	Unigene58172_BJA:0.12,13.5;
PF04411.7	DUF524	Protein of unknown function (DUF524)	CL5293.Contig1_BJA:0.19,12.8;
PF09322.5	DUF1979	Domain of unknown function (DUF1979)	CL11408.Contig1_BJA:0.23,12.3;CL11408.Contig2_BJA:0.23,12.3;
PF04878.8	Baculo_p48	Baculovirus P48 protein	Unigene57172_BJA:1.4,9.0;
PF14403.1	CP_ATPgrasp_2	Circularly permuted ATP-grasp type 2	Unigene2511_BJA:0.0093,15.9;Unigene33245_BJA:0.37,10.6;
PF12909.2	DUF3832	Protein of unknown function (DUF3832)	Unigene47559_BJA:0.1,13.8;
PF11388.3	DotA	Phagosome trafficking protein DotA	CL424.Contig9_BJA:0.29,12.4;
PF04875.7	DUF645	Protein of unknown function, DUF645	CL10325.Contig1_BJA:0.063,14.2;
PF08624.5	CRC_subunit	Chromatin remodelling complex Rsc7/Swp82 subunit	Unigene10115_BJA:0.23,12.6;
PF11258.3	DUF3048	Protein of unknown function (DUF3048)	Unigene35937_BJA:0.16,12.3;
PF09564.5	RE_NgoBV	NgoBV restriction endonuclease	Unigene6260_BJA:0.39,11.1;
